# Supplementary material
Source: publisher figshare collection journal article supplement (https://tandf.figshare.com/ndownloader/files/22437038)
Supplement: Supplementary file 1 [file 22437038]

## Sheet: test_set
# 70 abstracts were randomly selected from search results for "radiation" on "PubMed (8/24/2019), composing the test set.
# We extracted co-occurrence relationships at single-sentence level from the test set by using self-developed bio-entity recognizer.
# Then our experts manually curated all the sentences in test set.
# Predicted results were obtained by bio-entity recognizer. Actual results were obtained by manual curation.
# Positive results means genes and ionizing-radiation keywords co-occurred at single-sentence level. Negative results means genes and ionizing-radiation keywords do not co-occurred at single-sentence level.
# Column matched_gene: genes recognized to be co-occurred with "ionizing radiation" keywords by bio-entity recognizer
# Column p_value: p-values of Chi-squared tests for independence f the recognized entities of gene and ionzing-radiation during relationship extraction
# Column tag: TP means the record is predicted positive, actual positive; FP means the record is predicted positive, actual negative; TN means the record is predicted negative, actual negative; FN means the record is predicted negative, actual positive.
PMID	matched_gene	p_value	tag	raw_text
20019063	EXO1	0.0346733	TP	Cells depleted of Exo1 show chromosomal instability and hypersensitivity to ionising radiation (IR) exposure.
20628392	KDR	1.13e-37	TP	We have investigated the anti-tumoural effects of BMS-690514, an inhibitor of both vascular endothelial growth factor receptor (VEGFR) and epidermal growth factor receptor (EGFR) signalling pathways, as a single agent and in combination with ionising radiation (IR) on several NSCLC cell lines.
20628392	EGF	1.68e-112	TP	We have investigated the anti-tumoural effects of BMS-690514, an inhibitor of both vascular endothelial growth factor receptor (VEGFR) and epidermal growth factor receptor (EGFR) signalling pathways, as a single agent and in combination with ionising radiation (IR) on several NSCLC cell lines.
20628392	EGFR	1.26e-127	TP	We have investigated the anti-tumoural effects of BMS-690514, an inhibitor of both vascular endothelial growth factor receptor (VEGFR) and epidermal growth factor receptor (EGFR) signalling pathways, as a single agent and in combination with ionising radiation (IR) on several NSCLC cell lines.
20628392	VEGFA	1.76e-205	TP	We have investigated the anti-tumoural effects of BMS-690514, an inhibitor of both vascular endothelial growth factor receptor (VEGFR) and epidermal growth factor receptor (EGFR) signalling pathways, as a single agent and in combination with ionising radiation (IR) on several NSCLC cell lines.
20713529	NPM1	1.39e-05	TP	Thr199-phosphorylated NPM1 (pT199-NPM1) is recruited to nuclear DNA damage foci induced by ionizing radiation (IR).
20811703	MAP1LC3A	1.93e-07	TP	When gemcitabine was combined with ionizing radiation treatment, LC3-II upregulation was enhanced.
21072054	PTEN	1.1e-10	TP	PTEN status switches cell fate between premature senescence and apoptosis in glioma exposed to ionizing radiation.
21072054	TNS1	0.00231256	FP	Loss of the tumor suppressor phosphatase and tensin homolog (PTEN) has frequently been observed in human gliomas, conferring AKT activation and resistance to ionizing radiation (IR) and drug treatments.
21072054	PTEN	1.1e-10	TP	Loss of the tumor suppressor phosphatase and tensin homolog (PTEN) has frequently been observed in human gliomas, conferring AKT activation and resistance to ionizing radiation (IR) and drug treatments.
21072054	AKT1	3.78e-44	TP	Loss of the tumor suppressor phosphatase and tensin homolog (PTEN) has frequently been observed in human gliomas, conferring AKT activation and resistance to ionizing radiation (IR) and drug treatments.
21514164	MAD2L2	0.123716	TP	Mitotic arrest deficient protein MAD2B is overexpressed in human glioma, with depletion enhancing sensitivity to ionizing radiation.
21514164	MAD2L2	0.123716	TP	In the present study, we investigated the expression levels of MAD2B in human gliomas and normal brain tissues, and determined whether depletion of MAD2B enhanced the sensitivity of glioma cells to ionizing radiation.
21514164	MAD2L2	0.123716	TP	Silencing of MAD2B markedly reduced clonogenic survival of glioma cells and significantly enhanced apoptosis in response to ionizing radiation.
21559952	IGFBP3	0.622844	FP	Furthermore, the kinetics in HT-1080 cells for \xce\xb1-particle irradiation show a delay of about 20 s for 53BP1 foci detection compared to wild-type MDC1, confirming the hierarchical assembly of both proteins.
21559952	CDC123	0.529865	FP	Furthermore, the kinetics in HT-1080 cells for \xce\xb1-particle irradiation show a delay of about 20 s for 53BP1 foci detection compared to wild-type MDC1, confirming the hierarchical assembly of both proteins.
21559952	EIF4EBP1	0.148196	FP	Furthermore, the kinetics in HT-1080 cells for \xce\xb1-particle irradiation show a delay of about 20 s for 53BP1 foci detection compared to wild-type MDC1, confirming the hierarchical assembly of both proteins.
21559952	VPS41	0.114521	FP	Furthermore, the kinetics in HT-1080 cells for \xce\xb1-particle irradiation show a delay of about 20 s for 53BP1 foci detection compared to wild-type MDC1, confirming the hierarchical assembly of both proteins.
21559952	MDC1	0.000737014	TP	Furthermore, the kinetics in HT-1080 cells for \xce\xb1-particle irradiation show a delay of about 20 s for 53BP1 foci detection compared to wild-type MDC1, confirming the hierarchical assembly of both proteins.
21559952	DLX4	0.00028706	FP	Furthermore, the kinetics in HT-1080 cells for \xce\xb1-particle irradiation show a delay of about 20 s for 53BP1 foci detection compared to wild-type MDC1, confirming the hierarchical assembly of both proteins.
21559952	TP53BP1	4.91e-23	TP	Furthermore, the kinetics in HT-1080 cells for \xce\xb1-particle irradiation show a delay of about 20 s for 53BP1 foci detection compared to wild-type MDC1, confirming the hierarchical assembly of both proteins.
21559952	IGFBP3	0.622844	FP	Living cells of the fibrosarcoma cell line HT-1080 stably expressing 53BP1 or full-length reconstituted MDC1 fused to Green Fluorescent Protein (GFP) were irradiated with protons and \xce\xb1-particles of linear energy transfers (LETs) of 15 and 75 keV/\xce\xbcm, respectively.
21559952	CDC123	0.529865	FP	Living cells of the fibrosarcoma cell line HT-1080 stably expressing 53BP1 or full-length reconstituted MDC1 fused to Green Fluorescent Protein (GFP) were irradiated with protons and \xce\xb1-particles of linear energy transfers (LETs) of 15 and 75 keV/\xce\xbcm, respectively.
21559952	EIF4EBP1	0.148196	FP	Living cells of the fibrosarcoma cell line HT-1080 stably expressing 53BP1 or full-length reconstituted MDC1 fused to Green Fluorescent Protein (GFP) were irradiated with protons and \xce\xb1-particles of linear energy transfers (LETs) of 15 and 75 keV/\xce\xbcm, respectively.
21559952	MDC1	0.000737014	TP	Living cells of the fibrosarcoma cell line HT-1080 stably expressing 53BP1 or full-length reconstituted MDC1 fused to Green Fluorescent Protein (GFP) were irradiated with protons and \xce\xb1-particles of linear energy transfers (LETs) of 15 and 75 keV/\xce\xbcm, respectively.
21559952	DLX4	0.00028706	FP	Living cells of the fibrosarcoma cell line HT-1080 stably expressing 53BP1 or full-length reconstituted MDC1 fused to Green Fluorescent Protein (GFP) were irradiated with protons and \xce\xb1-particles of linear energy transfers (LETs) of 15 and 75 keV/\xce\xbcm, respectively.
21559952	TP53BP1	4.91e-23	TP	Living cells of the fibrosarcoma cell line HT-1080 stably expressing 53BP1 or full-length reconstituted MDC1 fused to Green Fluorescent Protein (GFP) were irradiated with protons and \xce\xb1-particles of linear energy transfers (LETs) of 15 and 75 keV/\xce\xbcm, respectively.
22037767	XRCC6	1.86e-08	TP	The mutagenesis of Ku70 vWA domain S155/D156 unexpectedly increased cell survival following ionizing radiation (IR) treatment.
22508697	INTS6	0.00087833	TP	In addition, INT6 silencing prevented sustained accumulation of ataxia telangiectasia mutated (ATM) at DNA damage sites in cells treated with \xce\xb3-radiation or the radiomimetic drug neocarzinostatin.
22508697	ATM	4.89e-27	TP	In addition, INT6 silencing prevented sustained accumulation of ataxia telangiectasia mutated (ATM) at DNA damage sites in cells treated with \xce\xb3-radiation or the radiomimetic drug neocarzinostatin.
22508716	RECQL4	0.137498	TP	The helicase domain and C-terminus of human RecQL4 facilitate replication elongation on DNA templates damaged by ionizing radiation.
22508716	RECQL	0.0726122	TP	The helicase domain and C-terminus of human RecQL4 facilitate replication elongation on DNA templates damaged by ionizing radiation.
22508716	DDX11	1.79e-11	FP	The helicase domain and C-terminus of human RecQL4 facilitate replication elongation on DNA templates damaged by ionizing radiation.
22508716	RECQL4	0.196307	TP	However, after exposure to ionizing radiation (IR), the RECQL4(\xce\x94C/\xce\x94C) cells exhibited hypersensitivity, inability to complete S phase and prematurely terminated or paused DNA replication forks.
22508716	RECQL	0.0726122	TP	However, after exposure to ionizing radiation (IR), the RECQL4(\xce\x94C/\xce\x94C) cells exhibited hypersensitivity, inability to complete S phase and prematurely terminated or paused DNA replication forks.
22508716	DLL4	1.77e-07	FP	However, after exposure to ionizing radiation (IR), the RECQL4(\xce\x94C/\xce\x94C) cells exhibited hypersensitivity, inability to complete S phase and prematurely terminated or paused DNA replication forks.
22571481	ACO2	0.0162669	TP	The present paper is an update of data on the effects of ionizing radiation (\xce\xb3-rays, X-rays, high energy UV, fast neutron) caused by environmental pollution or clinical treatments and the effects of non-ionizing radiation (low energy UV) on the expression and/or activity of drug metabolism (e.g., cytochrome P450 (CYP), glutathione transferase (GST)), enzymes involved in oxidative stress (e…
22571481	KLK15	0.000784766	TP	The present paper is an update of data on the effects of ionizing radiation (\xce\xb3-rays, X-rays, high energy UV, fast neutron) caused by environmental pollution or clinical treatments and the effects of non-ionizing radiation (low energy UV) on the expression and/or activity of drug metabolism (e.g., cytochrome P450 (CYP), glutathione transferase (GST)), enzymes involved in oxidative stress (e…
22571481	ACO2	1.48e-07	TP	The present paper is an update of data on the effects of ionizing radiation (\xce\xb3-rays, X-rays, high energy UV, fast neutron) caused by environmental pollution or clinical treatments and the effects of non-ionizing radiation (low energy UV) on the expression and/or activity of drug metabolism (e.g., cytochrome P450 (CYP), glutathione transferase (GST)), enzymes involved in oxidative stress (e…
22571481	KLK15	1.73e-13	TP	The present paper is an update of data on the effects of ionizing radiation (\xce\xb3-rays, X-rays, high energy UV, fast neutron) caused by environmental pollution or clinical treatments and the effects of non-ionizing radiation (low energy UV) on the expression and/or activity of drug metabolism (e.g., cytochrome P450 (CYP), glutathione transferase (GST)), enzymes involved in oxidative stress (e…
22571481	GSTP1	6.31e-14	TP	The present paper is an update of data on the effects of ionizing radiation (\xce\xb3-rays, X-rays, high energy UV, fast neutron) caused by environmental pollution or clinical treatments and the effects of non-ionizing radiation (low energy UV) on the expression and/or activity of drug metabolism (e.g., cytochrome P450 (CYP), glutathione transferase (GST)), enzymes involved in oxidative stress (e…
22571481	GSTP1	4.29e-63	TP	The present paper is an update of data on the effects of ionizing radiation (\xce\xb3-rays, X-rays, high energy UV, fast neutron) caused by environmental pollution or clinical treatments and the effects of non-ionizing radiation (low energy UV) on the expression and/or activity of drug metabolism (e.g., cytochrome P450 (CYP), glutathione transferase (GST)), enzymes involved in oxidative stress (e…
22571481	SOD1	3.92e-73	TP	The present paper is an update of data on the effects of ionizing radiation (\xce\xb3-rays, X-rays, high energy UV, fast neutron) caused by environmental pollution or clinical treatments and the effects of non-ionizing radiation (low energy UV) on the expression and/or activity of drug metabolism (e.g., cytochrome P450 (CYP), glutathione transferase (GST)), enzymes involved in oxidative stress (e…
22571481	CAT	4.62e-81	TP	The present paper is an update of data on the effects of ionizing radiation (\xce\xb3-rays, X-rays, high energy UV, fast neutron) caused by environmental pollution or clinical treatments and the effects of non-ionizing radiation (low energy UV) on the expression and/or activity of drug metabolism (e.g., cytochrome P450 (CYP), glutathione transferase (GST)), enzymes involved in oxidative stress (e…
22571481	PPIG	3.8e-92	TP	The present paper is an update of data on the effects of ionizing radiation (\xce\xb3-rays, X-rays, high energy UV, fast neutron) caused by environmental pollution or clinical treatments and the effects of non-ionizing radiation (low energy UV) on the expression and/or activity of drug metabolism (e.g., cytochrome P450 (CYP), glutathione transferase (GST)), enzymes involved in oxidative stress (e…
22571481	CAT	0	TP	The present paper is an update of data on the effects of ionizing radiation (\xce\xb3-rays, X-rays, high energy UV, fast neutron) caused by environmental pollution or clinical treatments and the effects of non-ionizing radiation (low energy UV) on the expression and/or activity of drug metabolism (e.g., cytochrome P450 (CYP), glutathione transferase (GST)), enzymes involved in oxidative stress (e…
22571481	PPIG	0	TP	The present paper is an update of data on the effects of ionizing radiation (\xce\xb3-rays, X-rays, high energy UV, fast neutron) caused by environmental pollution or clinical treatments and the effects of non-ionizing radiation (low energy UV) on the expression and/or activity of drug metabolism (e.g., cytochrome P450 (CYP), glutathione transferase (GST)), enzymes involved in oxidative stress (e…
22571481	SOD1	0	TP	The present paper is an update of data on the effects of ionizing radiation (\xce\xb3-rays, X-rays, high energy UV, fast neutron) caused by environmental pollution or clinical treatments and the effects of non-ionizing radiation (low energy UV) on the expression and/or activity of drug metabolism (e.g., cytochrome P450 (CYP), glutathione transferase (GST)), enzymes involved in oxidative stress (e…
22592846	NEU3	0.845836	TP	All of the cells subjected to ionizing radiations showed an increase of the activity of plasma membrane \xce\xb2-glucosidase, \xce\xb2-galactosidase and sialidase Neu3, in addition of the well known increase of activity of plasma membrane sphingomyelinase, under similar conditions.
22592846	GLB1	2.69e-25	TP	All of the cells subjected to ionizing radiations showed an increase of the activity of plasma membrane \xce\xb2-glucosidase, \xce\xb2-galactosidase and sialidase Neu3, in addition of the well known increase of activity of plasma membrane sphingomyelinase, under similar conditions.
22596249	AKT1	3.78e-44	TP	After exposure of cells to ionizing radiation (IR), Akt1 and DNA-PKcs form a functional complex in a first initiating step of DNA-DSB repair.
22596249	PRKDC	1.08e-148	TP	After exposure of cells to ionizing radiation (IR), Akt1 and DNA-PKcs form a functional complex in a first initiating step of DNA-DSB repair.
22725252	UBR5	0.0888435	FP	["The following cytosine modifications were quantified as modified 2'-deoxyribonucleosides upon exposure of DNA to ionizing radiation in aqueous aerated solution: 5-hydroxyhydantoin (Hyd-Ura) > 5-hydroxyuracil (5-OHUra) > 5-hydroxycytosine (5-OHCyt) > 5,6-dihydroxy-5,6-dihydrouracil (Ura-Gly) > 1-carbamoyl-4,5-dihydroxy-2-oxoimidazolidine (Imid-Cyt)."]
22792303	HTR1A	2.42e-52	FP	Moreover, TOV-21G cells are hypersensitive to ionizing radiation, which is due to the compromised DNA damage repair capacity in these cells.
23026049	MST1R	1.52e-11	TP	c-Met inhibitor SU11274 enhances the response of the prostate cancer cell line DU145 to ionizing radiation.
23026049	MET	1.32e-12	TP	c-Met inhibitor SU11274 enhances the response of the prostate cancer cell line DU145 to ionizing radiation.
23026049	MST1R	1.52e-11	TP	Our study is the first to show the effectiveness of combining c-Met inhibition with ionizing radiation to cure hormone-refractory prostate cancer.
23026049	MET	1.32e-12	TP	Our study is the first to show the effectiveness of combining c-Met inhibition with ionizing radiation to cure hormone-refractory prostate cancer.
23063726	CASC3	0.176858	FP	In the presence of BMSCs, Dex plus BTZ combination inhibited ionizing radiation-induced interleukin 6 secretion from BMSCs and induced myeloma cytotoxicity.
23063726	IL6	0	TP	In the presence of BMSCs, Dex plus BTZ combination inhibited ionizing radiation-induced interleukin 6 secretion from BMSCs and induced myeloma cytotoxicity.
23166716	ERBB2	8.85e-103	TP	We found that (Z(HER2\xe2\x88\xb6342))\xe2\x82\x82 sensitizes the HER2-overexpressing cell line SKBR-3 to ionizing radiation.
23230321	TAT	3.87e-08	FP	The exquisite cytotoxicity of \xce\xb1-radiation, the result of its high mean energy deposition [high linear energy transfer (LET)] and limited range in tissue, provides for a highly controlled therapeutic modality that can be targeted to selected malignant cells [targeted \xce\xb1-therapy (TAT)] with minimal normal tissue effects.
23325583	BRCA1	2.49e-18	TP	Aggressive, basal-like, ER-negative breast tumors occur in younger women, African-American women, women who carry BRCA1 mutation, and women exposed to ionizing radiation.
23330577	MAEA	0.000741738	FP	Non-ionizing radiation electromagnetic pulse (EMP) is generally recorded to induce the generation of free radicals in vivo.
23354848	BRAF	1.7e-30	TP	Genotype-dependent cooperation of ionizing radiation with BRAF inhibition in BRAF V600E-mutated carcinomas.
23465891	SHBG	1.38e-11	TP	The paper deals with effects of the ionising radiation (\xce\xb3-IR, 0.5\xc2\xa0Gy) upon serum testosterone (T), characteristics of testosterone-binding globulin (TeBG) and androgen receptor (AR) in parallel with observation of androgen (A) responsive enzyme activity - hexokinase (HK).
23465891	AR	6.87e-16	TP	The paper deals with effects of the ionising radiation (\xce\xb3-IR, 0.5\xc2\xa0Gy) upon serum testosterone (T), characteristics of testosterone-binding globulin (TeBG) and androgen receptor (AR) in parallel with observation of androgen (A) responsive enzyme activity - hexokinase (HK).
23465891	SHBG	1.24e-46	TP	The paper deals with effects of the ionising radiation (\xce\xb3-IR, 0.5\xc2\xa0Gy) upon serum testosterone (T), characteristics of testosterone-binding globulin (TeBG) and androgen receptor (AR) in parallel with observation of androgen (A) responsive enzyme activity - hexokinase (HK).
23465891	AR	5.27e-72	TP	The paper deals with effects of the ionising radiation (\xce\xb3-IR, 0.5\xc2\xa0Gy) upon serum testosterone (T), characteristics of testosterone-binding globulin (TeBG) and androgen receptor (AR) in parallel with observation of androgen (A) responsive enzyme activity - hexokinase (HK).
24055598	GSN	2.97e-66	FP	The rheological properties of xanthan gels, before and after lyophilisation, were measured and it was concluded that an increased dose of gamma rays (40 kGy) increased the viscosity coefficient and yield stress of silymarin wafers.
24175971	TAT	1.62e-15	TP	HIV-TAT mediated protein transduction of Cu/Zn-superoxide dismutase-1 (SOD1) protects skin cells from ionizing radiation.
24175971	SOD1	3.92e-73	TP	HIV-TAT mediated protein transduction of Cu/Zn-superoxide dismutase-1 (SOD1) protects skin cells from ionizing radiation.
24175971	TAT	9.13e-94	TP	Compared with natural SOD1, the application of TAT-SOD1 significantly enhanced the viability and decreased the apoptosis induced by X-ray irradiation.
24175971	SOD1	0	TP	Compared with natural SOD1, the application of TAT-SOD1 significantly enhanced the viability and decreased the apoptosis induced by X-ray irradiation.
24175971	TAT	1.62e-15	TP	The aim of this study was to evaluate the protective role of HIV-TAT protein transduction domain mediated protein transduction of SOD1 (TAT-SOD1) against ionizing radiation.
24175971	SOD1	3.92e-73	TP	The aim of this study was to evaluate the protective role of HIV-TAT protein transduction domain mediated protein transduction of SOD1 (TAT-SOD1) against ionizing radiation.
24305851	MYC	2.73e-66	TP	Absence of DNA damage after 60-Hz electromagnetic field exposure combined with ionizing radiation, hydrogen peroxide, or c-Myc overexpression.
24305851	MT1M	0.477654	FP	NIH3T3 mouse fibroblast cells, WI-38 human lung fibroblast cells, L132 human lung epithelial cells, and MCF10A human mammary gland epithelial cells were exposed for 4 or 16 h to a 60-Hz, 1 mT uniform magnetic field in the presence or absence of ionizing radiation (IR, 1 Gy), H(2)O(2) (50 \xce\xbcM), or c-Myc oncogenic activation.
24305851	NISCH	0.00711139	FP	NIH3T3 mouse fibroblast cells, WI-38 human lung fibroblast cells, L132 human lung epithelial cells, and MCF10A human mammary gland epithelial cells were exposed for 4 or 16 h to a 60-Hz, 1 mT uniform magnetic field in the presence or absence of ionizing radiation (IR, 1 Gy), H(2)O(2) (50 \xce\xbcM), or c-Myc oncogenic activation.
24305851	MYC	2.73e-66	TP	NIH3T3 mouse fibroblast cells, WI-38 human lung fibroblast cells, L132 human lung epithelial cells, and MCF10A human mammary gland epithelial cells were exposed for 4 or 16 h to a 60-Hz, 1 mT uniform magnetic field in the presence or absence of ionizing radiation (IR, 1 Gy), H(2)O(2) (50 \xce\xbcM), or c-Myc oncogenic activation.
24918814	ROS1	7.87e-06	FP	RESULTS: Ionising radiation induced a dramatic reactive oxygen species (ROS)-mediated inhibition of GI, leading to AP-modified Hsp27 protein accumulation that, in a mechanism involving p53 and NF-\xce\xbaB, triggered an apoptotic mitochondrial pathway.
24918814	TP53	2.71e-07	TP	RESULTS: Ionising radiation induced a dramatic reactive oxygen species (ROS)-mediated inhibition of GI, leading to AP-modified Hsp27 protein accumulation that, in a mechanism involving p53 and NF-\xce\xbaB, triggered an apoptotic mitochondrial pathway.
24918814	HSPB1	2.28e-12	TP	RESULTS: Ionising radiation induced a dramatic reactive oxygen species (ROS)-mediated inhibition of GI, leading to AP-modified Hsp27 protein accumulation that, in a mechanism involving p53 and NF-\xce\xbaB, triggered an apoptotic mitochondrial pathway.
24918814	NFKB1	1.84e-203	TP	RESULTS: Ionising radiation induced a dramatic reactive oxygen species (ROS)-mediated inhibition of GI, leading to AP-modified Hsp27 protein accumulation that, in a mechanism involving p53 and NF-\xce\xbaB, triggered an apoptotic mitochondrial pathway.
25191741	ENO2	3.63e-11	FP	UNLABELLED: The study objective was to explore the peculiarities of peripheral blood values in rats under the combined influence of 10.0 mg/kg N-stearoylethanolamine (NSE) and 6.0 Gy dose of ionizing radiation to identify the radiomodifying properties of the drug.
25605253	HDAC2	0.000398118	TP	Silencing of HDAC2 enhanced the cell death caused by ionizing radiation in lung cancer cells.
25703009	BAX	4.76e-110	TP	In addition, NTHSP could markedly inhibit the expressions of Bax protein and promote the expressions of Bcl-2 protein, accordingly inhibit the releases of cytochrome c and expressions of activated Caspase-3, and therefore block the mitochondrial apoptotic pathway of splenocytes in mice induced by (60)Co-\xce\xb3 radiation.
25703009	CYCS	5.29e-245	TP	In addition, NTHSP could markedly inhibit the expressions of Bax protein and promote the expressions of Bcl-2 protein, accordingly inhibit the releases of cytochrome c and expressions of activated Caspase-3, and therefore block the mitochondrial apoptotic pathway of splenocytes in mice induced by (60)Co-\xce\xb3 radiation.
25703009	BCL2	0	TP	In addition, NTHSP could markedly inhibit the expressions of Bax protein and promote the expressions of Bcl-2 protein, accordingly inhibit the releases of cytochrome c and expressions of activated Caspase-3, and therefore block the mitochondrial apoptotic pathway of splenocytes in mice induced by (60)Co-\xce\xb3 radiation.
25703009	CASP3	0	TP	In addition, NTHSP could markedly inhibit the expressions of Bax protein and promote the expressions of Bcl-2 protein, accordingly inhibit the releases of cytochrome c and expressions of activated Caspase-3, and therefore block the mitochondrial apoptotic pathway of splenocytes in mice induced by (60)Co-\xce\xb3 radiation.
25724524	SERPINB3	0.207929	FP	UV radiation and \xce\xb1-genus human papillomavirus (HPV) are highly associated with SCC, but a novel role for \xce\xb2-genus HPV is suspected in BRAFi-cSCC.
26254422	LDHA	0.00691962	TP	We found that LDHA expression is increased in human and animal lung tissue exposed to ionizing radiation.
26254422	LDHA	0.00691962	TP	We demonstrate that ionizing radiation induces LDHA, lactate production, and extracellular acidification in primary human lung fibroblasts in a dose-dependent manner.
26254422	LDHA	0.00691962	TP	Here, we wanted to test the hypothesis that ionizing radiation leads to excessive lactate production via expression of the enzyme lactate dehydrogenase-A (LDHA) to promote myofibroblast differentiation.
26553641	EPHA3	0.971143	FP	Exposure of HEK cells to the \xce\xb2-rays emitted by the radiation source dose-dependently decreased cell growth and increased NF-\xce\xbaB activation.
26553641	NFKB1	3.21e-07	TP	Exposure of HEK cells to the \xce\xb2-rays emitted by the radiation source dose-dependently decreased cell growth and increased NF-\xce\xbaB activation.
29181121	ROS1	7.87e-06	FP	Besides the direct radiation damage, most of the ionizing radiation- (IR-) induced injuries were caused by generation of reactive oxygen species (ROS).
29386059	CD109	0.197884	FP	This study aimed to investigate the potential role of MicroRNA-150 (miR-150) in increase the sensitivities of NK/T cell lymphoma to ionizing radiation.
29386059	CD109	0.197884	FP	Our further in vitro and in vivo studies illustrated that overexpression of miR-150 substantially enhanced the sensitivity of NK/T cell lymphoma cells to ionizing radiation treatment.
20019063			TN	Phosphorylation of Exo1 modulates homologous recombination repair of DNA double-strand breaks.
20019063			TN	DNA double-strand break (DSB) repair via the homologous recombination pathway is a multi-stage process, which results in repair of the DSB without loss of genetic information or fidelity.
20019063			TN	One essential step in this process is the generation of extended single-stranded DNA (ssDNA) regions at the break site.
20019063			TN	This ssDNA serves to induce cell cycle checkpoints and is required for Rad51 mediated strand invasion of the sister chromatid.
20019063			TN	Here, we show that human Exonuclease 1 (Exo1) is required for the normal repair of DSBs by HR.
20019063			TN	We find that Exo1 accumulates rapidly at DSBs and is required for the recruitment of RPA and Rad51 to sites of DSBs, suggesting a role for Exo1 in ssDNA generation.
20019063			TN	Interestingly, the phosphorylation of Exo1 by ATM appears to regulate the activity of Exo1 following resection, allowing optimal Rad51 loading and the completion of HR repair.
20019063			TN	These data establish a role for Exo1 in resection of DSBs in human cells, highlighting the critical requirement of Exo1 for DSB repair via HR and thus the maintenance of genomic stability.
20628392			TN	BMS-690514, a VEGFR and EGFR tyrosine kinase inhibitor, shows anti-tumoural activity on non-small-cell lung cancer xenografts and induces sequence-dependent synergistic effect with radiation.
20628392			TN	CONCLUSION: The results of association with radiation show that BMS-690514 may be a successful adjuvant to clinical radiotherapy.
20628392			TN	These findings are of translational importance because the clinical benefits of anti-EGFR and anti-VEGFR therapy might be schedule dependent.
20628392			TN	BACKGROUND: Non-small-cell lung cancer (NSCLC) is an aggressive disease in which vascular endothelial growth factor (VEGF) and epidermal growth factor (EGF) are implicated in tumour growth, tumour resistance to radiation and chemotherapy, and disease relapse.
20628392			TN	METHODS: Radiosensitisation of several NSCLC cell lines by BMS-690514 was assessed in vitro using clonogenic assay and in vivo using nude mice.
20628392			TN	RESULTS: In vitro studies showed that BMS-690514 alone decreases clonogenic survival of NSCLC cells lines but no potential enhancement of IR response was observed in the combination.
20628392			TN	In tumour-bearing mice, BMS-690514 alone inhibits the growth of NSCLC xenografts, including the T790M mutation-harbouring H1975 tumour.
20628392			TN	The concomitant combination of BMS-690514 and radiation did not increase mice survival in comparison with treatment with IR alone.
20628392			TN	In contrast, BMS-690514 markedly enhances the anti-tumour effect of radiation in a sequential manner on H1299 and H1975 xenografts.
20628392			TN	Immunohistochemistry revealed a qualitative reduction in vessel area after administrations of BMS-690514, compared with vehicle-treated controls, suggesting that revascularisation may explain the schedule dependency of the tumour-growth delay observed.
20713529			TN	Recruitment of phosphorylated NPM1 to sites of DNA damage through RNF8-dependent ubiquitin conjugates.
20713529			TN	Collectively, our findings suggest that phosphorylated NPM1 is a novel component in DSB repair that is recruited by ubiquitin conjugates downstream of RNF8 and RNF168.
20713529			TN	Protein accumulation at DNA double-strand breaks (DSB) is essential for genome stability; however, the mechanisms governing these events are not fully understood.
20713529			TN	Here, we report a new role for the nucleophosmin protein NPM1 in these mechanisms.
20713529			TN	Foci formation is impaired by depletion of the E3 ubiquitin ligases RNF8 and RNF168 or the E2 Ubc13, and pT199-NPM1 binds to Lys63-linked ubiquitin polymers in vitro.
20713529			TN	Thus, phosphorylated NPM1 may interact with RNF8-dependent ubiquitin conjugates at sites of DNA damage.
20713529			TN	The interaction was found to rely on T199 phosphorylation, an acidic tract, and an adjacent ubiquitin-interacting motif-like domain.
20713529			FN	Depletion of the breast cancer suppressor BRCA1 or its partner, RAP80, enhanced IR-induced NPM1 foci and prolonged persistence of the foci, possibly implicating BRCA1 in pT199-NPM1 action and dynamics.
20713529			FN	Replacement of endogenous NPM1 with its nonphosphorylable T199A mutant prolonged persistence of IR-induced RAD51 foci accompanied by unrepaired DNA damage.
20811703			TN	The role of autophagy in the treatment of pancreatic cancer with gemcitabine and ionizing radiation.
20811703			TN	The blockage of autophagy by 3-methyladenine indicated that autophagy contributed to cell death after gemcitabine treatment and enhanced its cytotoxicity.
20811703			TN	The inhibitory effect and immune reactivity of the autophagy-related proteins LC3 and beclin-1 were the strongest after the combination treatment.
20811703			TN	In conclusion, these results suggest that autophagy can be activated by gemcitabine and/or ionizing radiation in the treatment of pancreatic cancer cells and that activated autophagy plays a role in cancer suppression.
20811703			TN	These findings may have important implications for future therapeutic strategies using gemcitabine and ionizing radiation against pancreatic cancer.
20811703			TN	Autophagy has recently emerged as a significant mechanism in cancer treatment.
20811703			TN	Although gemcitabine and/or ionizing radiation are important modalities in the treatment of pancreatic cancer, the contribution of autophagy in such treatment has not been fully elucidated.
20811703			TN	This study investigated the role of autophagy in the treatment of pancreatic cancer with gemcitabine and ionizing radiation.
20811703			TN	To evaluate the effect of gemcitabine and/or ionizing radiation on autophagy, several human pancreatic cancer cell lines were used.
20811703			TN	The treatment of pancreatic cancer cell cultures in vitro and in vivo with gemcitabine and ionizing radiation resulted in synergistic cytotoxicity.
20811703			TN	After treatment with gemcitabine, the autophagy-related protein light chain 3-II (LC3-II) was upregulated.
20811703			TN	In addition, electron microscopy of pancreatic cancer cells treated with gemcitabine and/or ionizing radiation detected the induction of autophagy.
21072054			TN	We conclude that premature senescence could have a compensatory role for apoptosis in the absence of the tumor suppressor PTEN through the AKT/ROS/p53/p21 signaling pathway.
21072054			TN	漏 2011 Macmillan Publishers Limited
21072054			TN	Recent reports have shown that PTEN loss or AKT activation induces premature senescence, but many details regarding this effect remain obscure.
21072054			TN	In this study, we tested whether the status of PTEN determined fate of the cell by examining PTEN-deficient U87, U251, and U373, and PTEN-proficient LN18 and LN428 glioma cells after exposure to IR.
21072054			TN	These cells exhibited different cellular responses, senescence or apoptosis, depending on the PTEN status.
21072054			TN	We further observed that PTEN-deficient U87 cells with high levels of both AKT activation and intracellular reactive oxygen species (ROS) underwent senescence, whereas PTEN-proficient LN18 cells entered apoptosis.
21072054			TN	ROS were indispensable for inducing senescence in PTEN-deficient cells, but not for apoptosis in PTEN-proficient cells.
21072054			FN	Furthermore, transfection with wild-type (wt) PTEN or AKT small interfering RNA induced a change from premature senescence to apoptosis and depletion of p53 or p21 prevented IR-induced premature senescence in U87 cells.
21072054			FN	Our data indicate that PTEN acts as a pivotal determinant of cell fate, regarding senescence and apoptosis in IR-exposed glioma cells.
21514164			TN	Copyright 漏 2010 Elsevier Ltd. All rights reserved.
21514164			TN	Mitotic arrest deficient protein MAD2B, an enzyme involved in translesion DNA synthesis, has been implicated in several cancers.
21514164			TN	However, its role in human glioma has not been defined.
21514164			TN	Using reverse transcription-polymerase chain reaction and immunohistochemical analysis, MAD2B was found to be overexpressed in glioma specimens compared with normal brain tissue.
21514164			TN	This effect was associated with caspase-3 activation and poly(ADP-ribose) polymerase (PARP) cleavage.
21514164			TN	Furthermore, disruption of MAD2B potentiated radiation-induced genomic damage, as evidenced by increased phosphorylation of gamma histone H2AX (纬-H2AX).
21514164			TN	Our findings reveal that expression of MAD2B is deregulated in glioma, and targeting MAD2B may be a potential strategy for improving the efficacy of radiotherapy.
21559952			TN	53BP1 and MDC1 foci formation in HT-1080 cells for low- and high-LET microbeam irradiations.
21559952			TN	Preliminary data for proton irradiations are shown and also these indicate a delay for 53BP1 versus MDC1.
21559952			TN	An improved assessment of the biological effects and related risks of low doses of ionizing radiation is currently an important issue in radiation biology.
21559952			TN	Irradiations using microbeams are particularly well suited for precise and localized dose depositions, whereas recombinant cell lines with fluorescent proteins allow the live observation of radiation-induced foci.
21559952			TN	Using a microbeam, the irradiations were carried out in line patterns, which facilitated the discrimination between undefined background and radiation-induced foci.
21559952			TN	As expected, foci formation and respective kinetics from 伪-particle irradiations with a high LET of 75 keV/渭m could be detected in a reliable manner by both fusion proteins, as reported previously.
21559952			TN	Colocalization of 纬-H2AX foci confirmed the DSB nature of the detected foci.
21559952			TN	As a novel result, the application of protons with low LET of 15 keV/渭m generated 53BP1- and MDC1-mediated foci of almost equal size and slightly different kinetics.
21559952			TN	This new data expands the capability of 53BP1 and wild-type MDC1 on visible foci formation in living cells after irradiation with low-LET particles.
22037767			TN	Ku regulates signaling to DNA damage response pathways through the Ku70 von Willebrand A domain.
22037767			TN	S155A substitution alone was sufficient to confer enhanced survival, whereas alteration to a phosphomimetic residue (S155D) reversed this effect, suggesting that S155 is a phosphorylation site.
22037767			TN	Thus, these findings infer that Ku links signals from the DNA repair machinery to DNA damage signaling regulators that control apoptotic pathways.
22037767			TN	The Ku heterodimer (Ku70/Ku80) is a main component of the nonhomologous end-joining (NHEJ) pathway that repairs DNA double-strand breaks (DSBs).
22037767			TN	Ku binds the broken DNA end and recruits other proteins to facilitate the processing and ligation of the broken end.
22037767			TN	While Ku interacts with many proteins involved in DNA damage/repair-related functions, few interactions have been mapped to the N-terminal von Willebrand A (vWA) domain, a predicted protein interaction domain.
22037767			TN	DNA repair appeared unaffected, but defects in the activation of apoptosis and alterations in the DNA damage signaling response were identified.
22037767			FN	In particular, Ku70 S155A/D156A affected the IR-induced transcriptional response of several activating transcription factor 2 (ATF2)-regulated genes involved in apoptosis regulation.
22037767			TN	ATF2 phosphorylation and recruitment to DNA damage-induced foci was increased in Ku70-deficient cells, suggesting that Ku represses ATF2 activation.
22037767			TN	Ku70 S155A/D156A substitutions further enhanced this repression.
22508697			TN	INT6/EIF3E interacts with ATM and is required for proper execution of the DNA damage response in human cells.
22508697			TN	Our findings reveal unexpected and striking connections of INT6 with ATM and BRCA1 and suggest that the protective action of INT6 in the onset of breast cancers relies on its involvement in the DNA damage response.
22508697			TN	Altered expression of the INT6 gene, encoding the e subunit of the translational initiation factor eIF3, occurs in human breast cancers, but how INT6 relates to carcinogenesis remains unestablished.
22508697			TN	Here, we show that INT6 is involved in the DNA damage response.
22508697			TN	INT6 was required for cell survival following 纬-irradiation and G(2)-M checkpoint control.
22508697			TN	RNA interference-mediated silencing of INT6 reduced phosphorylation of the checkpoint kinases CHK1 and CHK2 after DNA damage.
22508697			TN	Mechanistically, this result could be explained by interaction of INT6 with ATM, which together with INT6 was recruited to the sites of DNA damage.
22508697			TN	Finally, INT6 silencing also reduced ubiquitylation events that promote retention of repair proteins at DNA lesions.
22508697			TN	Accordingly, accumulation of the repair factor BRCA1 was defective in the absence of INT6.
22508716			TN	The vertebrate RECQL4 (RECQ4) gene is thought to be the ortholog of budding yeast SLD2.
22508716			TN	However, RecQL4 contains within its C-terminus a RecQ-like helicase domain, which is absent in Sld2.
22508716			TN	We established human pre-B lymphocyte Nalm-6 cells, in which the endogenous RECQL4 gene was homozygously targeted such that the entire C-terminus would not be expressed.
22508716			TN	The RECQL4(螖C/螖C) cells behaved like the parental cells during unperturbed DNA replication or after treatment with agents that induce stalling of DNA replication forks, such as hydroxyurea (HU).
22508716			FN	Deletion of BLM, a gene that also encodes a RecQ helicase, had the opposite phenotype; an almost wild-type response to IR, but hypersensitivity to HU.
22508716			TN	Targeting both RECQL4 and BLM resulted in viable cells, which exhibited mostly additive phenotypes compared with those exhibited by the RECQL4(螖C/螖C) and the BLM(-/-) cells.
22508716			FN	We propose that RecQL4 facilitates DNA replication in cells that have been exposed to IR.
22571481			FN	Summary of information on the effects of ionizing and non-ionizing radiation on cytochrome P450 and other drug metabolizing enzymes and transporters.
22571481			TN	The collective information is as presented by the cited author(s) in cases where several references are cited the latest published information is included.
22571481			TN	Remarks and conclusions suggesting clinically important impacts are highlighted, followed by discussion of the major findings.
22571481			TN	The searchable database is available as an Excel file (for information about file availability contact the corresponding author).
22571481			TN	The data are presented in tabular form (Tables 1-3) and are a continuation of previously published summaries on the effects of drugs and other chemicals on cytochrome P450 enzymes (Rendic, S.; Di Carlo, F. Drug Metab.
22571481			TN	Rev., 1997, 29 (1-2), 413-580, Rendic, S. Drug Metab.
22571481			TN	Rev., 2002, 34 (1-2), 83- 448) and of the data on the effects of diseases and environmental factors on the expression and/or activity of human cytochrome P450 enzymes and transporters (Guengerich, F.P.
22571481			TN	; Rendic, S. Curr.
22571481			TN	Drug Metab., 2010, 11(1), 1-3, Rendic, S.; Guengerich, F.P.
22571481			TN	Curr.
22571481			TN	Drug Metab., 2010, 11 (1), 4-84).
22592846			TN	Ionizing radiations increase the activity of the cell surface glycohydrolases and the plasma membrane ceramide content.
22592846			TN	GM3 became component of the plasma membranes and was transformed into LacCer, GlcCer and ceramide.
22592846			TN	The quantity of ceramide produced in irradiated cells was about two times that of control cells.
22592846			TN	We detected significant levels of 尾-glucosidase, 尾-galactosidase, sialidase Neu3 and sphingomyelinase activities associated with the plasma membrane of fibroblasts from normal and Niemann-Pick subjects and of cells from breast, ovary, colon and neuroblastoma tumors in culture.
22592846			TN	Human breast cancer cell line T47D was studied in detail.
22592846			TN	In these cells the increase of activity of 尾-glucosidase and 尾-galactosidase was parallel to the increase of irradiation dose up to 60聽Gy and continued with time, at least up to 72聽h from irradiation.
22592846			TN	尾-glucosidase increased up to 17 times and 尾-galactosidase up to 40 times with respect to control.
22592846			TN	Sialidase Neu3 and sphingomyelinase increased about 2 times at a dose of 20聽Gy but no further significant differences were observed with increase of radiation dose and time.
22592846			TN	After irradiation, we observed a reduction of cell proliferation, an increase of apoptotic cell death and an increase of plasma membrane ceramide up to 3 times, with respect to control cells.
22592846			TN	Tritiated GM3 ganglioside has been administered to T47D cells under conditions that prevented the lysosomal catabolism.
22596249			TN	Akt promotes post-irradiation survival of human tumor cells through initiation, progression, and termination of DNA-PKcs-dependent DNA double-strand break repair.
22596249			TN	Akt1-dependent DNA-PKcs kinase activity stimulates autophosphorylation of DNA-PKcs at S2056 that is needed for efficient DNA-DSB repair and the release of DNA-PKcs from the damage site.
22596249			TN	Thus, targeting of Akt results in radiosensitization of DNA-PKcs and Ku80 expressing, but not of cells deficient for, either of these proteins.
22596249			TN	The data showed indicate for the first time that Akt through an immediate complex formation with DNA-PKcs can stimulate the accumulation of DNA-PKcs at DNA-DSBs and promote DNA-PKcs activity for efficient NHEJ DNA-DSB repair.
22596249			TN	Akt phosphorylation has previously been described to be involved in mediating DNA damage repair through the nonhomologous end-joining (NHEJ) repair pathway.
22596249			TN	Yet the mechanism how Akt stimulates DNA-protein kinase catalytic subunit (DNA-PKcs)-dependent DNA double-strand break (DNA-DSB) repair has not been described so far.
22596249			TN	In the present study, we investigated the mechanism by which Akt can interact with DNA-PKcs and promote its function during the NHEJ repair process.
22596249			TN	The results obtained indicate a prominent role of Akt, especially Akt1 in the regulation of NHEJ mechanism for DNA-DSB repair.
22596249			TN	As shown by pull-down assay of DNA-PKcs, Akt1 through its C-terminal domain interacts with DNA-PKcs.
22596249			TN	Thereafter, Akt plays a pivotal role in the recruitment of AKT1/DNA-PKcs complex to DNA duplex ends marked by Ku dimers.
22596249			TN	Moreover, in the formed complex, Akt1 promotes DNA-PKcs kinase activity, which is the necessary step for progression of DNA-DSB repair.
22725252			TN	Profiling cytosine oxidation in DNA by LC-MS/MS.
22725252			TN	The reaction of Fenton-like reagents with DNA gave a different distribution of cytosine derived products compared to ionizing radiation, which likely reflects the reaction of metal ions with intermediate peroxyl radicals or hydroperoxides.
22725252			TN	The analysis of the main cytosine oxidation products will help elucidate the complex mechanism of oxidative degradation of cytosine in DNA and probe the consequences of these reactions in biology and medicine.
22725252			TN	Spontaneous and oxidant-induced damage to cytosine is probably the main cause of CG to TA transition mutations in mammalian genomes.
22725252			TN	The reaction of hydroxyl radical (路OH) and one-electron oxidants with cytosine derivatives produces numerous oxidation products, which have been identified in large part by model studies with monomers and short oligonucleotides.
22725252			TN	Here, we developed an analytical method based on LC-MS/MS to detect 10 oxidized bases in DNA, including 5 oxidation products of cytosine.
22725252			TN	The utility of this method is demonstrated by the measurement of base damage in isolated calf thymus DNA exposed to ionizing radiation in aerated aqueous solutions (0-200 Gy) and to well-known Fenton-like reactions (Fe(2+) or Cu(+) with H(2)O(2) and ascorbate).
22725252			TN	The total yield of cytosine oxidation products was comparable to that of thymine oxidation products (5,6-dihydroxy-5,6-dihydrothymine (Thy-Gly), 5-hydroxy-5-methylhydantotin (Hyd-Thy), 5-(hydroxymethyl)uracil (5-HmUra), and 5-formyluracil (5-ForUra)) as well as the yield of 8-oxo-7,8-dihydroguanine (8-oxoGua).
22725252			TN	The major oxidation product of cytosine in DNA was Hyd-Ura.
22725252			TN	In contrast, the formation of Imid-Cyt was a minor pathway of DNA damage, although it is the major product arising from irradiation of the monomers, cytosine, and 2'-deoxycytidine.
22792303			TN	Loss of BRCA1-A complex function in RAP80 null tumor cells.
22792303			TN	Identification of TOV-21G as a RAP80 null tumor cell line will be very useful for the study of the molecular mechanism in DNA damage response.
22792303			TN	Receptor Associated Protein 80 (RAP80) is a subunit of the BRCA1-A complex and targets BRCA1 to DNA damage sites in response to DNA double strand breaks.
22792303			TN	Since mutations of BRCA1 are associated with familial ovarian cancers, we screened 26 ovarian cancer-derived cell lines for RAP80 mutations and found that TOV-21G cells harbor a RAP80 mutation (c.1107G >A).
22792303			TN	This mutation generates a stop codon at Trp369, which deletes the partial AIR region and the C-terminal zinc fingers of RAP80.
22792303			TN	Interestingly, both the mutant and wild type alleles of RAP80 lose their expression due to promoter hypermethylation, suggesting that TOV-21G is a RAP80-null cell line.
22792303			TN	In these cells, not only is the BRCA1-A complex disrupted, but the relocation of the remaining subunits in the BRCA1-A complex including BRCA1, CCDC98, NBA1, BRCC36 and BRE is significantly suppressed.
22792303			TN	Reconstitution of TOV-21G cells with wild type RAP80 rescues these cellular defects in response to DNA damage.
22792303			TN	Thus, our results demonstrate that RAP80 is a scaffold protein in the BRCA1-A complex.
23026049			TN	Hormone-refractory prostate cancer shows substantial resistance to most conventional therapies including radiotherapy, constitutes a key impediment to curing patients with the disease.
23026049			TN	c-Met overexpression plays a key role in prostate cancer tumorigenesis and disease progression.
23026049			TN	Here, we demonstrate that c-Met inhibition by SU11274 could significantly suppress cell survival and proliferation as well as enhance the radiosensitivity of DU145 cells.
23026049			TN	The underlying mechanisms of the effects of SU11274 on DU145 cells may include the inhibition of c-Met signaling, depolarization of the mitochondrial membrane potential, impairment of DNA repair function, abrogation of cell cycle arrest, and enhancement of cell death.
23026049			TN	Copyright 漏 2012 Elsevier Inc. All rights reserved.
23063726			TN	Combination chemotherapy increases cytotoxicity of multiple myeloma cells by modification of nuclear factor (NF)-魏B activity.
23063726			TN	Furthermore, combination therapy downregulated the NF-魏B-targeted gene expression of interleukin 6 and manganese superoxide dismutase, which can induce chemo- and radio-resistance in MM.
23063726			TN	This study provides a mechanistic rationale for combining the NF-魏B-targeting drugs Dex and BTZ in myeloma therapy and supports potential combinations of these drugs with radiotherapy and additional chemotherapeutic drugs for clinical benefit in MM.
23063726			TN	Published by Elsevier Inc.
23063726			TN	The nuclear factor (NF)-魏B signaling pathway is critical in myeloma cell proliferation, inhibition of apoptosis, and emergence of therapy resistance.
23063726			TN	The chemotherapeutic drugs, dexamethasone (Dex) and bortezomib (BTZ), are widely used in clinical protocols for multiple myeloma (MM) and inhibit the NF-魏B signaling pathway by distinct mechanisms.
23063726			TN	This study evaluates the efficacy of combination therapy with Dex and BTZ and investigates the mechanistic underpinning of endogenous and therapy-induced NF-魏B activation in MM.
23063726			TN	Human myeloma cells and bone marrow stromal cells (BMSCs) were used in monocultures and cocultures to determine the cytotoxic effects of Dex and/or BTZ.
23063726			TN	Our results show that combined treatment of Dex with BTZ enhanced direct apoptosis of drug-sensitive and drug-resistant myeloma cells.
23063726			TN	Mechanistically, Dex treatment increased I魏B伪 protein and mRNA expression and compensated for BTZ-induced I魏B伪 degradation.
23063726			TN	Dex plus BTZ combination inhibited basal and therapy-induced NF-魏B activity with cytotoxicity in myeloma cells resistant to BTZ.
23166716			TN	The HER2-binding affibody molecule (Z(HER2鈭?42))鈧?increases radiosensitivity in SKBR-3 cells.
23166716			TN	We have previously shown that the HER2-specific affibody molecule (Z(HER2鈭?42))鈧?inhibits proliferation of SKBR-3 cells.
23166716			TN	Here, we continue to investigate its biological effects in vitro by studying receptor dimerization and clonogenic survival following irradiation.
23166716			TN	The survival after exposure to (Z(HER2鈭?42))鈧?and 8 Gy (S(8Gy) 0.006) was decreased by a factor four compared to the untreated (S(8Gy) 0.023).
23166716			TN	The low HER2-expressing cell line MCF-7 was more radiosensitive than SKBR-3 but did not respond to (Z(HER2鈭?42))鈧?
23166716			TN	Treatment by (Z(HER2鈭?42))鈧?strongly increased the levels of dimerized and phosphorylated HER2 even after 5 minutes of stimulation.
23166716			TN	The monomeric Z(HER2鈭?42) does not seem to be able to induce receptor phosphorylation and dimerization or sensitize cells to irradiation.
23230321			TN	Molecular pathways: targeted 伪-particle radiation therapy.
23230321			TN	An 伪-particle, a (4)He nucleus, is exquisitely cytotoxic and indifferent to many limitations associated with conventional chemo- and radiotherapy.
23230321			TN	A burgeoning interest in the development of TAT is buoyed by the increasing number of ongoing clinical trials worldwide.
23230321			TN	The short path length renders 伪-emitters suitable for treatment and management of minimal disease such as micrometastases or residual tumor after surgical debulking, hematologic cancers, infections, and compartmental cancers such as ovarian cancer or neoplastic meningitis.
23230321			TN	Yet, despite decades of study of high LET radiation, the mechanistic pathways of the effects of this modality remain not well defined.
23230321			TN	The modality is effectively presumed to follow a simple therapeutic mechanism centered on catastrophic double-strand DNA breaks without full examination of the actual molecular pathways and targets that are activated that directly affect cell survival or death.
23230321			TN	This Molecular Pathways article provides an overview of the mechanisms and pathways that are involved in the response to and repair of TAT-induced DNA damage as currently understood.
23230321			TN	Finally, this article highlights the current state of clinical translation of TAT as well as other high-LET radionuclide radiation therapy using 伪-emitters such as (225)Ac, (211)At, (213)Bi, (212)Pb, and (223)Ra.
23325583			TN	Does microenvironment contribute to the etiology of estrogen receptor-negative breast cancer?
23325583			TN	What dictates the prevalence of certain types of breast cancer, which are classified by markers, particularly estrogen receptor (ER), expression profiles such as basal or luminal, and genetic alterations such as HER2 amplification, in particular populations is not well understood.
23325583			TN	It is increasingly evident that microenvironment disruption is highly intertwined with cancer progression.
23325583			TN	Here, the idea that microenvironment shapes the course of carcinogenesis, and hence breast cancer subtype, is discussed.
23325583			TN	Recent experimental studies using ionizing radiation, a well-documented environmental exposure, suggest that certain processes in the microenvironment strongly favor the development of ER-negative tumors.
23325583			TN	Understanding the contribution of tissue microenvironment during carcinogenesis could lead to prevention strategies that are personalized to age, agent, and exposure to reduce the risk of aggressive breast cancer.
23330577			TN	Electromagnetic pulse reduces free radical generation in rat liver mitochondria in vitro.
23330577			TN	Though mitochondria are the primary site to produce free radicals, a rare report is designed to directly investigate the EMP effects on free radical generation at mitochondrial level.
23330577			TN	Thus the present work was designed to study how EMP induces free radical generation in rat liver mitochondria in vitro using electron paramagnetic resonance technique.
23330577			TN	Surprisingly, our data suggest that EMP prevents free radical generation by activating antioxidant enzyme activity and reducing oxygen consumption and therefore free radical generation.
23330577			TN	Electron spin resonance measurements clearly demonstrate that disordering of mitochondrial lipid fluidity and membrane proteins mobility are the underlying contributors to this decreased oxygen consumption.
23330577			TN	Therefore, our results suggest that EMP might hold the potentiality to be developed as a non-invasive means to benefit certain diseases.
23354848			TN	In cells with BRAF V600E mutations, PLX4720 caused cell cycle arrest at G1, and, when combined with radiation, caused a combined G1 and G2 cell cycle arrest; this pattern of cell cycle effects was not seen in the BRAF WT cell line.
23354848			TN	CONCLUSIONS: These data suggest additive, combinatorial activity between radiation and PLX4720 in cancers carrying BRAF V600E mutations.
23354848			TN	Our data has potential for translation into the multimodality treatment of BRAF V600E-mutated cancers.
23354848			TN	BACKGROUND: A substantial proportion of solid tumors carry the BRAF V600E mutation, which causes activation of the MEK/MAPK pathway and is a poor prognostic indicator.
23354848			TN	Patients with locally advanced human cancers are often treated with external beam radiation therapy.
23354848			TN	Given the association of Raf overactivation with radioresistance, we hypothesized that, in BRAF V600E-mutated carcinomas, there would be combinatorial activity between radiation and PLX4720, a specific BRAF V600E-inhibitor.
23354848			TN	METHODS: Two BRAF V600E-mutated cancer cell lines and one BRAF-V600E wildtype (WT) cancer cell line were obtained.
23354848			TN	We performed cell viability assays and clonogenic assays using combinations of radiation and PLX4720.
23354848			TN	We assessed MEK and MAPK phosphorylation at different PLX4720 concentrations with western blotting, and cell cycle progression was evaluated by flow cytometry.
23354848			TN	RESULTS: Our results show combinatorial, additive activity between radiation and PLX4720 in BRAF V600E-mutated cell lines, but not in the BRAF WT line.
23354848			TN	In BRAF V600E-mutated cells, there was a PLX4720 concentration-dependent decrease in MEK and MAPK phosphorylation.
23465891			TN	The low dose gamma ionising radiation impact upon cooperativity of androgen-specific proteins.
23465891			TN	The interdependence or relationships of T-levels with parameters of the proteins that provide androgenic regulation are consequently analyzed in post-IR dynamics.
23465891			FN	The IR-stress adjustment data reveal expediency of TeBG- and AR-cooperativity measurements for more precise assessments of endocrine A-control at appropriate emergencies.
23465891			TN	Copyright 漏 2013 Elsevier Ltd. All rights reserved.
24055598			TN	Silymarin released from sterile wafers restores glucose impaired endothelial cell migration.
24055598			TN	Copyright 漏 2013 Elsevier B.V. All rights reserved.
24055598			TN	Reduced oxygen tension combined with high glucose concentration leads to chronic wounds in diabetic patients.
24055598			TN	Delayed wound healing is due in part to impaired angiogenesis as a result of reduced endothelial cell migration.
24055598			TN	Topical applications, in the form of sterile lyophilised wafers hold promise for the treatment of chronic diabetic wounds.
24055598			TN	In this study wafers containing silymarin were prepared using xanthan gum and sterilised with 25 and 40 kGy gamma radiation.
24055598			TN	HPLC analysis indicated that 89-90% of silymarin was retained in the wafers after irradiation.
24055598			TN	Dermal microvascular cell migration studies in the presence of high glucose and reduced oxygen tension levels, using novel radial migration and wound healing assays developed 'in house', were also undertaken.
24055598			TN	Silymarin, when formulated as a lyophilised wafer, successfully retained its ability to overcome the high glucose induced reduction in endothelial cell migration.
24175971			TN	Moreover, TAT-SOD1 reduced ROS and preserved mitochondrial integrity after radiation exposure in HaCaT cells.
24175971			TN	Radiation-induced 纬H2AX foci, which are representative of DNA double strand breaks, were decreased by pretreatment with TAT-SOD1.
24175971			TN	Furthermore, subcutaneous application of TAT-SOD1 resulted in a significant decrease in 45聽Gy electron beam-induced ROS and MDA concentration in the skins of rats.
24175971			TN	CONCLUSIONS: This study provides evidences for the protective role of TAT-SOD1 in alleviating radiation-induced damage in HaCaT cells and rat skins, which suggests a new therapeutic strategy for radiation-induced skin injury.
24175971			TN	BACKGROUND: Radiation-induced skin injury remains a serious concern during radiotherapy.
24175971			TN	Cu/Zn-superoxide dismutase (Cu/Zn-SOD, SOD1) is a conserved enzyme for scavenging superoxide radical in cells.
24175971			TN	Because of the integrity of cell membranes, exogenous molecule is not able to be incorporated into cells, which limited the application of natural SOD1.
24175971			TN	METHODS: The recombinant TAT-SOD1 and SOD1 were obtained by prokaryotic-based protein expression system.
24175971			TN	The transduction effect and biological activity of TAT-SOD1 was measured by immunofluorescence and antioxidant capability assays in human keratinocyte HaCaT cells.
24175971			TN	Mito-Tracker staining, reactive oxygen species (ROS) generation assay, cell apoptosis analysis and malondialdehyde (MDA) assay were used to access the protective effect of TAT- SOD1.
24175971			TN	RESULTS: Uptake of TAT-SOD1 by HaCaT cells retained its biological activity.
24305851			TN	The principal objective of this study was to assess the DNA damage in a normal cell line system after exposure to 60 Hz of extremely low frequency magnetic field (ELF-MF) and particularly in combination with various external factors, via comet assays.
24305851			TN	The results obtained showed no significant differences between the cells exposed to ELF-MF alone and the unexposed cells.
24305851			FN	Moreover, no synergistic or additive effects were observed after 4 or 16 h of pre-exposure to 1 mT ELF-MF or simultaneous exposure to ELF-MF combined with IR, H(2)O(2), or c-Myc activation.
24918814			TN	Glyoxalase I inhibition induces apoptosis in irradiated MCF-7 cells via a novel mechanism involving Hsp27, p53 and NF-魏B.
24918814			FN	CONCLUSIONS: Glyoxalase I is involved in the IR-induced MCF-7 cell mitochondrial apoptotic pathway via a novel mechanism involving Hsp27, p53 and NF-魏B.
24918814			TN	BACKGROUND: Glyoxalase I (GI) is a cellular defence enzyme involved in the detoxification of methylglyoxal (MG), a cytotoxic byproduct of glycolysis, and MG-derived advanced glycation end products (AGEs).
24918814			TN	Argpyrimidine (AP), one of the major AGEs coming from MG modifications of proteins arginines, is a pro-apoptotic agent.
24918814			TN	Radiotherapy is an important modality widely used in cancer treatment.
24918814			TN	Exposure of cells to ionising radiation (IR) results in a number of complex biological responses, including apoptosis.
24918814			TN	The present study was aimed at investigating whether, and through which mechanism, GI was involved in IR-induced apoptosis.
24918814			TN	METHODS: Apoptosis, by TUNEL assay, transcript and protein levels or enzymatic activity, by RT-PCR, western blot and spectrophotometric methods, respectively, were evaluated in irradiated MCF-7 breast cancer cells, also in experiments with appropriate inhibitors or using small interfering RNA.
24918814			TN	Inhibition of GI occurred at both functional and transcriptional levels, the latter occurring via ERK1/2 MAPK and ER伪 modulation.
25191741			TN	Combined effect of N-stearoyiletanolamine and ionizing radiation on hematological indices of peripheral blood in rats.
25191741			TN	METHODS: hematological, statistical.
25191741			TN	RESULTS: it was found that NSE injection to irradiated rats leads to exacerbation of hematopoietic system disorders indicating to radiosensitizing effect of the substance.
25191741			TN	CONCLUSIONS: The radiosensitizing effect of the drug was established according to qualitative and quantitative abnormalities in peripheral blood values of the rats.
25191741			TN	Effect of the NSE drug on the rate of recovery processes (i.e.
25191741			TN	retardation) in the peripheral blood of rats after irradiation was established under these experimental conditions.
25191741			TN	Rodionova N. K., Atamanjuk N. P., Derevjanko L. P., Talko V. V., Janina A. M., Shelkovskyj M. V., Kosjakova G. V., Meged O. F., Gula N. M., Chumak A.
25191741			TN	A., 2013.
25605253			TN	Selective inhibition of histone deacetylase 2 induces p53-dependent survivin downregulation through MDM2 proteasomal degradation.
25605253			TN	In the present study, we found that selective inhibition of histone deacetylase 2 (HDAC2) with small inhibitory RNA (siRNA) induced survivin downregulation in a p53-dependent manner.
25605253			TN	Interestingly, suberoylanilide hydroxamic acid (SAHA) or knockdown of HDAC2 induced downregulation of Mdm2, a negative regulator of p53, at the protein level.
25605253			TN	SAHA and/or HDAC2 siRNA increased Mdm2 ubiquitination, and MG132, an inhibitor of proteosome function, prevented HDAC2 inhibition-induced degradation of Mdm2.
25605253			TN	Clinically, the mRNA levels of HDAC2 and survivin were prominently overexpressed in lung cancer patients compared to normal lung tissues.
25605253			TN	Collectively, our results indicate that selective inhibition of HDAC2 causes survivin downregulation through activation of p53, which is mediated by downregulation of Mdm2.
25605253			TN	They further suggest that HDAC2 may exert a dominant effect on lung cancer cell survival by sustaining Mdm2-survivin levels.
25703009			TN	Radioprotective activity of neutral polysaccharides isolated from the fruiting bodies of Hohenbuehelia serotina.
25703009			TN	In this study, the radioprotective effect of neutral polysaccharides from Hohenbuehelia serotina (NTHSP) against the damages induced by (60)Co-纬 radiation was investigated.
25703009			TN	The results showed that NTHSP could significantly improve the activity of glutathione peroxidase (GSH-Px) and increase the contents of glutathione (GSH) and ceruloplasmin in plasma after treated with 6 Gy-radiation compared with the radiation controls (p < 0.05).
25703009			TN	Furthermore, administration with NTHSP could effectively increase the quantity of marrow DNA (p < 0.05) and reduce the rates of chromosome aberration and micronuclei (p < 0.01) in bone marrows of mice.
25703009			TN	These results suggested that NTHSP might be a natural radioprotective agent against the injuries induced by radiation.
25703009			TN	Copyright 漏 2015 Associazione Italiana di Fisica Medica.
25703009			TN	Published by Elsevier Ltd. All rights reserved.
25724524			TN	Contribution of Beta-HPV Infection and UV Damage to Rapid-Onset Cutaneous Squamous Cell Carcinoma during BRAF-Inhibition Therapy.
25724524			TN	During vemurafenib therapy, BRAFi-cSCC-WF arose 11.6 weeks more rapidly than conventional cSCC when controlled for gender and UV exposure (P value = 0.03).
25724524			TN	Among all BRAFi-cSCC, 尾-genus HPV-17, HPV-38, HPV-111 were most frequently isolated, and novel 尾-HPV genotypes were discovered (CTR, CRT-11, CRT-22).
25724524			TN	Sequencing revealed 63% of evaluated BRAFi-cSCCs harbored RAS mutations with PIK3CA, CKIT, ALK, and EGFR mutations also detected.
25724524			TN	CONCLUSIONS: We examined clinical, histopathologic, viral, and genetic parameters in BRAFi-cSCC demonstrating rapid onset; wart-like histomorphology; 尾-HPV-17, HPV-38, and HPV-111 infection; UV damage; and novel ALK and CKIT mutations.
25724524			TN	Discovered 尾-HPV genotypes expand the spectrum of tumor-associated viruses.
25724524			TN	These findings enhance our understanding of factors cooperating with BRAF inhibition that accelerate keratinocyte oncogenesis as well as broaden the knowledge base of multifactorial mediators of cancer in general.
25724524			TN	漏2015 American Association for Cancer Research.
25724524			TN	PURPOSE: BRAF-inhibition (BRAFi) therapy for advanced melanoma carries a high rate of secondary cutaneous squamous cell carcinoma (cSCC) and risk of other cancers.
25724524			TN	Cutaneous 尾-HPV may act in concert with host and environmental factors in BRAFi-cSCC.
25724524			TN	EXPERIMENTAL DESIGN: Primary BRAFi-cSCC tissue DNA isolated from patients receiving vemurafenib or dabrafenib from two cancer centers was analyzed for the presence of cutaneous oncogenic viruses and host genetic mutations.
25724524			TN	Diagnostic specimens underwent consensus dermatopathology review.
25724524			TN	Clinical parameters for UV exposure and disease course were statistically analyzed in conjunction with histopathology.
25724524			TN	RESULTS: Twenty-nine patients contributed 69 BRAFi-cSCC lesions.
25724524			TN	BRAFi-cSCC had wart-like features (BRAFi-cSCC-WF) in 22% of specimens.
26254422			TN	Ionizing radiation induces myofibroblast differentiation via lactate dehydrogenase.
26254422			TN	We also demonstrate that genetic and pharmacologic inhibition of LDHA protects against radiation-induced myofibroblast differentiation.
26254422			TN	Furthermore, LDHA inhibition protects from radiation-induced activation of TGF-尾.
26254422			TN	We propose a profibrotic feed forward loop, in which radiation induces LDHA expression and lactate production, which can lead to further activation of TGF-尾 to drive the fibrotic process.
26254422			TN	These studies support the concept of LDHA as an important therapeutic target in radiation-induced pulmonary fibrosis.
26254422			TN	Copyright 漏 2015 the American Physiological Society.
26254422			TN	Pulmonary fibrosis is a common and dose-limiting side-effect of ionizing radiation used to treat cancers of the thoracic region.
26254422			TN	Few effective therapies are available for this disease.
26254422			TN	Pulmonary fibrosis is characterized by an accumulation of myofibroblasts and excess deposition of extracellular matrix proteins.
26254422			TN	Although prior studies have reported that ionizing radiation induces fibroblast to myofibroblast differentiation and collagen production, the mechanism remains unclear.
26254422			TN	Transforming growth factor-尾 (TGF-尾) is a key profibrotic cytokine that drives myofibroblast differentiation and extracellular matrix production.
26254422			TN	However, its activation and precise role in radiation-induced fibrosis are poorly understood.
26254422			TN	Recently, we reported that lactate activates latent TGF-尾 through a pH-dependent mechanism.
26553641			TN	Space experiment "Cellular Responses to Radiation in Space (CellRad)": Hardware and biological system tests.
26553641			TN	For implementation of CellRad in the Biolab on the International Space Station (ISS), tests of the hardware and the biological systems were performed.
26553641			TN	The sequence of different steps in MPU fabrication (cutting, drilling, cleaning, growth surface coating, and sterilization) was optimized in order to reach full biocompatibility.
26553641			TN	Different coatings of the foil used as growth surface revealed that coating with 0.1 mg/ml poly-D-lysine supports cell attachment better than collagen type I.
26553641			TN	The tests of prototype hardware (Science Model) proved its full functionality for automated medium change, irradiation and fixation of cells.
26553641			TN	The signal of the fluorescent proteins after formaldehyde fixation was stable for at least six months after fixation, allowing storage of the MPUs after fixation for several months before the transport back to Earth and evaluation of the fluorescence intensity.
26553641			TN	In conclusion, these tests show the feasibility of CellRad on the ISS with the currently available transport mechanisms.
26553641			TN	Copyright 漏 2015 The Committee on Space Research (COSPAR).
26553641			TN	Published by Elsevier Ltd. All rights reserved.
26553641			TN	One factor contributing to the high uncertainty in radiation risk assessment for long-term space missions is the insufficient knowledge about possible interactions of radiation with other spaceflight environmental factors.
26553641			TN	Such factors, e.g.
26553641			TN	microgravity, have to be considered as possibly additive or even synergistic factors in cancerogenesis.
26553641			TN	Regarding the effects of microgravity on signal transduction, it cannot be excluded that microgravity alters the cellular response to cosmic radiation, which comprises a complex network of signaling pathways.
26553641			TN	The purpose of the experiment "Cellular Responses to Radiation in Space" (CellRad, formerly CERASP) is to study the effects of combined exposure to microgravity, radiation and general space flight conditions on mammalian cells, in particular Human Embryonic Kidney (HEK) cells that are stably transfected with different plasmids allowing monitoring of proliferation and the Nuclear Factor 魏B (NF-魏B)…
26553641			TN	The cells will be seeded on ground in multiwell plate units (MPUs), transported to the ISS, and irradiated by an artificial radiation source after an adaptation period at 0脳g and 1脳g.
26553641			TN	After different incubation periods, the cells will be fixed by pumping a formaldehyde solution into the MPUs.
26553641			TN	Ground control samples will be treated in the same way.
29181121			TN	Ginger Oleoresin Alleviated
29181121			TN	It suggests that ginger oleoresin has a potential role of being an effective antioxidant and radioprotective agent.
29181121			TN	Unplanned exposure to radiation can cause side effects on high-risk individuals; meanwhile, radiotherapies can also cause injury on normal cells and tissues surrounding the tumor.
29181121			TN	Human mesenchymal stem cells (hMSCs), which possess self-renew and multilineage differentiation capabilities, are a critical population of cells to participate in the regeneration of IR-damaged tissues.
29181121			TN	Therefore, it is imperative to search effective radioprotectors for hMSCs.
29181121			TN	This study was to demonstrate whether natural source ginger oleoresin would mitigate IR-induced injuries in human mesenchymal stem cells (hMSCs).
29181121			TN	We demonstrated that ginger oleoresin could significantly reduce IR-induced cytotoxicity, ROS generation, and DNA strand breaks.
29181121			TN	In addition, the ROS-scavenging mechanism of ginger oleoresin was also investigated.
29181121			TN	The results showed that ginger oleoresin could induce the translocation of Nrf2 to cell nucleus and activate the expression of cytoprotective genes encoding for HO-1 and NQO-1.
29386059			TN	MicroRNA-150 enhances radiosensitivity by inhibiting the AKT pathway in NK/T cell lymphoma.
29386059			TN	Radioresistance is a major challenge during the treatment of NK/T cell lymphoma.
29386059			TN	In this study, we found that miR-150 was significantly decreased in NK/T cell lymphoma tissues and cell lines.
29386059			TN	Low expression of miR-150 was positively associated with therapeutic resistance in 36 NK/T cell lymphoma cases.
29386059			TN	Furthermore, luciferase reporter assays in NK/T cell lymphoma cells transfected with the AKT2 or AKT3 three prime untranslated region reporter constructs established AKT2 and AKT3 as direct targets of miR-150.
29386059			TN	The phosphatidylinositol 3-kinase inhibitor LY294002 was used to inhibit Akt to verify miR-150 increase NK/T cell lymphoma cell radiorsensitivity through suppress the PI3K/AKT/mTOR pathway.
29386059			TN	Taken together, this study demonstrates that miR-150 might serve as a potential therapeutic sensitizer through inhibition of the AKT pathway in NK/T cell lymphoma treatment.
29726723			TN	Surgical approaches for the treatment of perihilar cholangiocarcinoma.
29726723			TN	Since their initial description, perihilar cholangiocarcinoma (pCCA) has remained one of the more clinically challenging scenarios encountered by hepatobiliary surgeons.
29726723			TN	Surgery remains the only potentially curative therapy, but requires complex, technically demanding operations with high associated morbidity and mortality.
29726723			TN	Over the last several decades, advances in surgical technique and perioperative management have improved patient outcomes.
29726723			TN	Areas covered: Achievement of optimal outcomes requires a multidisciplinary approach from a team of providers with expertise in hepatobiliary and oncologic surgery, medical oncology, radiation oncology, and advanced gastroenterology.
29726723			TN	We herein report a comprehensive review on pCCA with an emphasis on surgical strategies and perioperative management.
29726723			TN	Expert commentary: Despite incremental improvements from advances in surgical technique and perioperative management, outcomes remain poor due to the aggressive systemic nature of this disease and the tendency for locoregional and distant recurrence.
29726723			TN	The marginal benefit observed with traditional systemic therapies continues to be a key weakness in current management.
29726723			TN	However, improved understanding of the genetic alterations and pathways that drive tumorigenesis has the potential to dramatically alter the way in which we care for these patients.
28247254			TN	Diel oscillation in the optical activity of carotenoids in the absorption spectrum of Nannochloropsis.
28247254			TN	In this paper we show that the absorption spectrum of the microalgae Nannochloropsis oceanica exhibits changes in response to the modulation of incident light.
28247254			TN	A model was used to analyze the contribution of different active pigments to the total absorption in the photosynthetically active radiation region and suggested consistent diel oscillations in the optical activity of carotenoids.
28301079			TN	Survival impact of induction chemotherapy in advanced head and neck cancer: A National Cancer Database analysis.
28301079			TN	Adding induction chemotherapy to concurrent chemotherapy and radiotherapy (RT) has generally not improved the overall survival (OS) in randomized trials of patients with head and neck cancer.
28301079			TN	This failure may stem from inadequate power or inappropriate patient selection, prompting this National Cancer Data Base analysis.
28301079			TN	8031 patients with T4 or N2b to N3 disease undergoing RT and chemotherapy were divided into induction chemotherapy and concurrent chemotherapy cohorts.
28301079			TN	Multivariate analysis was used to explore the association of treatment with survival and to identify predictors of radiation dose.
28301079			TN	On multivariate analysis incorporating sociodemographic and clinical variables, survival of the induction chemotherapy cohort was not significantly different from that of the concurrent cohort (hazard ratio [HR], 0.96; 95% confidence interval [CI], 0.88-1.05; p = .35), nor on subgroup analyses of advanced disease.
28301079			TN	Multivariate analysis demonstrated increased odds of receiving <66 Gy among the patients in the induction chemotherapy cohort (p < .01).
28301079			TN	Induction chemotherapy subjects experienced no survival advantage over concurrent chemotherapy subjects but were more likely to receive lower RT doses.
28301079			TN	漏 2017 Wiley Periodicals, Inc. Head Neck 39: 1113-1121, 2017.
28301079			TN	漏 2017 Wiley Periodicals, Inc.
28338030			TN	Implant outcomes poorer in patients with history of periodontal disease.
28338030			TN	Data sourcesMedline and Embase databases and bibliographies of all included articles and relevant review articles were screened for possible inclusion.Study selectionLongitudinal studies were included reporting on implant survival, success, incidence of peri-implantitis, bone loss and periodontal status and on partially dentate patients with a history of treatment for periodontitis.
28338030			TN	There were no language restrictions for the included studies.Data extraction and synthesisAuthors independently and in duplicate assessed the studies for eligibility and data extraction.
28338030			TN	Disagreements were resolved by discussion and consensus.
28338030			TN	The methodological quality assessment of the included studies was done using an adapted Newcastle-Ottawa Scale (NOS).
28338030			TN	Confounding factors such as smoking, systemic disease influencing osseointegration, chemotherapy and radiation were assessed and adjusted in the analysis.
28338030			TN	Data were organised into tables and grouped in accordance with the study design.ResultsTwenty-four studies reported in 27 publications were included.
28338030			TN	Implant survival and success rate were higher in periodontally healthy patients.Twelve prospective cohort studies, five case series with a control group, four retrospective cohort studies and three studies with a sub group comparison were included.Bone loss and peri-implantitis were increased in patients with a history of treated periodontitis.
28338030			TN	More complications were reported in patients presenting with more severe forms of periodontitis.
28338030			TN	High heterogeneity among the studies in terms of study design, population, therapy, unit of analysis, inconsistent definitions of baseline and outcomes, inadequate reporting and confounding factors meant a meta-analysis could not be performed.Most of the studies showed better implant survival rates for the non-periodontitis group ranging from 91.67% to 100% compared to the treated periodontitis g…
28338030			TN	Severe forms of periodontal disease are associated with higher rates of implant loss.
28338030			TN	The conclusion of the review is limited by the strength of the evidence.
28885678			TN	Understanding urinary toxicity after radiotherapy for prostate cancer: first steps forward.
28885678			TN	One of the most relevant achievements of Professor Gianni Bonadonna was the implementation of the methodology of controlled clinical trials in medical oncology.
28885678			TN	It is valid for all cancer types, oncological disciplines and clinical endpoints, both survival and toxicity.
28885678			TN	This narrative review reports on the status of the current knowledge of the radiation-induced urinary syndrome after external-beam radiotherapy for prostate cancer.
28885678			TN	In recent years, the syndrome has been the object of large-scale prospective observational trials specifically devoted to investigating the association of patient and treatment features with acute/late urinary toxicity.
28885678			TN	The first results of these trials allow initial attempts at predictive modeling, which can serve as a basis for the optimization of patient selection and treatment planning.
29039184			TN	Single Walled Carbon Nanotube Based Air Pocket Encapsulated Ultraviolet Sensor.
29039184			TN	Carbon nanotube (CNT) is a promising candidate as a sensor material for the sensitive detection of gases/vapors, biomarkers, and even some radiation, as all these external variables affect the resistance and other properties of nanotubes, which forms the basis for sensing.
29039184			TN	Ultraviolet (UV) radiation does not impact the nanotube properties given the substantial mismatch of bandgaps and therefore, CNTs have never been considered for UV sensing, unlike the popular ZnO and other oxide nanwires.
29039184			TN	It is well-known that UV assists the adsorption/desorption characteristics of oxygen on carbon nanotubes, which changes the nanotube resistance.
29039184			TN	Here, we demonstrate a novel sensor structure encapsulated with an air pocket, where the confined air is responsible for the UV sensing mechanism and assures sensor stability and repeatability over time.
29039184			TN	In addition to the protection from any contamination, the air pocket encapsulated sensor offers negligible baseline drift and fast recovery compared to previously reported sensors.
29039184			TN	The air pocket isolated from the outside environment can act as a stationary oxygen reservoir, resulting in consistent sensor characteristics.
29039184			TN	Furthermore, this sensor can be used even in liquid environments.
29060063			TN	A miniaturized UWB antenna for implantable data telemetry.
29060063			TN	This paper presents a miniaturized impulse radio ultra-wideband (IR-UWB) antenna which is designed for transcutaneous, short-distance data communication used in multichannel neural recording.
29060063			TN	In these systems, with the increasing number of recording channels, data rates of 10-100 Mbit/s must be transmitted with very limited power and area.
29060063			TN	Therefore, the antennas are designed as planar, ellipsoidal dipoles on a high permittivity substrate with 蔚
26878583			TN	Broadband acoustic properties of a murine skull.
26878583			TN	It has been well recognized that the presence of a skull imposes harsh restrictions on the use of ultrasound and optoacoustic techniques in the study, treatment and modulation of the brain function.
26878583			TN	We propose a rigorous modeling and experimental methodology for estimating the insertion loss and the elastic constants of the skull over a wide range of frequencies and incidence angles.
26878583			TN	A point-source-like excitation of ultrawideband acoustic radiation was induced via the absorption of nanosecond duration laser pulses by a 20 渭m diameter microsphere.
26878583			TN	The acoustic waves transmitted through the skull are recorded by a broadband, spherically focused ultrasound transducer.
26878583			TN	A coregistered pulse-echo ultrasound scan is subsequently performed to provide accurate skull geometry to be fed into an acoustic transmission model represented in an angular spectrum domain.
26878583			TN	The modeling predictions were validated by measurements taken from a glass cover-slip and ex vivo adult mouse skulls.
26878583			TN	The flexible semi-analytical formulation of the model allows for seamless extension to other transducer geometries and diverse experimental scenarios involving broadband acoustic transmission through locally flat solid structures.
26878583			TN	It is anticipated that accurate quantification and modeling of the skull transmission effects would ultimately allow for skull aberration correction in a broad variety of applications employing transcranial detection or transmission of high frequency ultrasound.
27125639			TN	In vivo sensitivity of the embryonic and adult neural stem cell compartments to low-dose radiation.
27125639			TN	The embryonic brain is radiation-sensitive, with cognitive deficits being observed after exposure to low radiation doses.
27125639			TN	Exposure of neonates to radiation can cause intracranial carcinogenesis.
27125639			TN	To gain insight into the basis underlying these outcomes, we examined the response of the embryonic, neonatal and adult brain to low-dose radiation, focusing on the neural stem cell compartments.
27125639			TN	This review summarizes our recent findings.
27125639			TN	At E13.5-14.5 the embryonic neocortex encompasses rapidly proliferating stem and progenitor cells.
27125639			TN	Exploiting mice with a hypomorphic mutation in DNA ligase IV (Lig4(Y288C) ), we found a high level of DNA double-strand breaks (DSBs) at E14.5, which we attribute to the rapid proliferation.
27125639			TN	We observed endogenous apoptosis in Lig4(Y288C) embryos and in WT embryos following exposure to low radiation doses.
27125639			TN	An examination of DSB levels and apoptosis in adult neural stem cell compartments, the subventricular zone (SVZ) and the subgranular zone (SGZ) revealed low DSB levels in Lig4(Y288C) mice, comparable with the levels in differentiated neuronal tissues.
27125639			TN	We conclude that the adult SVZ does not incur high levels of DNA breakage, but sensitively activates apoptosis; apoptosis was less sensitively activated in the SGZ, and differentiated neuronal tissues did not activate apoptosis.
27125639			TN	P5/P15 mice showed intermediate DSB levels, suggesting that DSBs generated in the embryo can be transmitted to neonates and undergo slow repair.
27125639			TN	Interestingly, this analysis revealed a stage of high endogenous apoptosis in the neonatal SVZ.
27125639			TN	Collectively, these studies reveal that the adult neural stem cell compartment, like the embryonic counterpart, can sensitively activate apoptosis.
27125639			TN	漏 The Author 2016.
27125639			TN	Published by Oxford University Press on behalf of The Japan Radiation Research Society and Japanese Society for Radiation Oncology.
27520784			TN	The Benefit of a Multidisciplinary Approach to the Patient Treated with (Chemo) Radiation for Head and Neck Cancer.
27520784			TN	In the past two decades, multidisciplinary care has emerged as new way to manage cancer given the need to gather together specific areas of expertise and to discuss the variety of treatment approaches available for each patient.
27520784			TN	Of all the cancer subtypes, head and neck cancer might be considered one of the most valid areas, from an oncological point of view, for a multidisciplinary approach to be applied.
27520784			TN	Head and Neck Cancer is a complex disease area due to its varied histology and subsites, its numerous feasible treatments, its multiple typical comorbidities, and its treatment-induced toxicities whose management requires the simultaneous involvement of several professionals as part of the same health care team.
27520784			TN	However, the benefits of a multidisciplinary team approach in this particular area have not yet been properly documented in terms of survival outcomes.
27520784			TN	Moreover, there are some concerns and the limitations of a multidisciplinary team approach for Head and Neck Cancer patients are still open to question: cost-efficiency, the implications from a medical law perspective, the level of expertise required and the timing of each intervention (fixed or as required; before, during or after oncological treatment), and the role of the leader with other int…
27756417			TN	Pancreatic cancer adjuvant radiotherapy target volume design: based on the postoperative local recurrence spatial location.
27756417			TN	To explore the areas at highest risk for postoperative pancreatic cancer local recurrence according to the spatial location of local failures, with the aim to provide a precise target volume for pancreatic cancer adjuvant radiotherapy.
27756417			TN	Patients with pancreatic cancer who had undergone surgery for the primary tumor in pancreas at our institution from January 2010 to August 2015 were retrospectively analyzed.
27756417			TN	All local recurrences were plotted on the computed tomography (CT) image of a representative patient according to their relative coordinates to superior mesenteric artery (SMA) or celiac axis (CA).
27756417			TN	Adjuvant radiation clinical target volume (CTV)-90 and CTV-80 were created to cover 90聽% and 80聽% plotted recurrences.
27756417			TN	This planning approach was applied in four simulated cases with comparison to the plan according to RTOG 0848 contouring consensus guidelines.
27756417			TN	Raystation v4.5.1.14 was used for analyzing high throughput physics data.
27756417			TN	Eighty-three patients with local recurrence were included from 305 postoperative pancreatic cancer patients who did not receive adjuvant radiotherapy.
27756417			TN	Thirty-one (37聽%) patients did not have adjuvant therapy at all, 52 (63聽%) patients undergone adjuvant chemotherapy alone.
27756417			TN	Spatial location of local failure was created.
27756417			TN	Most recurrences occurred near CA or SMA.
27756417			TN	CTV-90 was generated through expanding the combined SMA and CA contours by 30聽mm right-lateral, 21聽mm left-lateral, 20聽mm anterior, 13聽mm posterior, 10聽mm superior, and 20聽mm inferior.
27756417			TN	CTV-80, smaller in volume, was also created for simultaneous integrated boost.
27756417			TN	Through comparison and analysis of the simulated cases, the radiation volumes proposed were much smaller than those with RTOG 0848 contouring consensus guidelines (average volume: PTV-80鈥?鈥?20聽ml, PTV-90鈥?鈥?20聽ml, RTOG PTV鈥?鈥?90聽ml).
27756417			TN	Accordingly, the organs at risk received less irradiation dose with the proposed CTV-90 and CTV-80.
27756417			TN	Smaller adjuvant radiotherapy CTVs targeting the high-risk local failure areas of postoperative pancreatic cancer were proposed, according to the three-dimensional spatial location of local recurrences.
27756417			TN	This may help to minimize radiation-related toxicities, achieve dose escalation, and finally reduce local recurrence.
28002056			TN	Radionulide analyses of ingested water from some estuaries within the coastal area of Akwa Ibom State, Nigeria.
28002056			TN	Radionuclide analyses of ingested water from three selected estuaries within the coastal areas of Akwa Ibom State, Nigeria have been carried out.
28002056			TN	Fifteen water samples collected at strategic points from the estuaries were pre-treated and each placed on the sodium iodide NaI (Tl) -model 802 detector for 3600 s to obtain the gamma radiation count rate.
28002056			TN	The activity concentrations and other radiological risk parameters were computed.
28002056			TN	The effective dose rate of radiation due to ingested water (E.D.I.W.)
28002056			TN	ranged between 0.25 and 1.86 mSv yr
30048090			TN	[Study on the Estimation Algorithm of the Temperature Based on Mid-Wave Infrared Remote Sensing].
30048090			TN	Since objects above absolute zero agree with the Plank law, the objects鈥?temperature is reflected by the infrared radiation.
30048090			TN	With fast response and high resolution, temperature estimation based on mid-wave infrared remote sensing could realize the temperature measurement for small, high-speed and touch-free objects.
30048090			TN	A new optical system for infrared (IR) image-spectrum integration remote sensing was used to acquire infrared emission spectra from different temperatures of metal.
30048090			TN	With this basis, we extracted four appropriate spectral features which were the center of gravity position, peak position, the value of wavelength 位1 and the value of wavelength 位2 from the training samples.
30048090			TN	The relationship between temperature and these features was studied.
30048090			TN	A multiple linear regression model was established to estimate the temperatures from the spectra.
30048090			TN	The experimental results showed that, the method could distinguish hot objects with obvious temperature differences.
30048090			TN	The absolute error was less than 30 鈩?in the experimental temperature range.
30048090			TN	The accuracy was 98% in the range that the measurement error was less than 20 鈩? which was better than the 2% precision of the general system with the complex strict emissivity, atmospheric transmittance, environmental equivalent radiation temperature and some other parameters.
30048090			TN	This method could measure the temperature of the remote objects in a simple and effective way, and so could expand the application field of temperature estimation based on infrared remote sensing.
25884619			TN	Identification of new genes contributing to the extreme radioresistance of Deinococcus radiodurans using a Tn5-based transposon mutant library.
25884619			TN	Here, we have developed an extremely efficient in vivo Tn5-based mutagenesis procedure to construct a Deinococcus radiodurans insertion mutant library subsequently screened for sensitivity to genotoxic agents such as 纬 and UV radiations or mitomycin C. The genes inactivated in radiosensitive mutants belong to various functional categories, including DNA repair functions, stress responses, signal …
25884619			TN	Interestingly, preliminary characterization of previously undescribed radiosensitive mutants suggests the contribution of cyclic di-AMP signaling in the recovery of D. radiodurans cells from genotoxic stresses, probably by modulating several pathways involved in the overall cell response.
25884619			TN	Our analyses also point out a new transcriptional regulator belonging to the GntR family, encoded by DR0265, and a predicted RNase belonging to the newly described Y family, both contributing to the extreme radioresistance of D. radiodurans.
25884619			TN	Altogether, this work has revealed new cell responses involved either directly or indirectly in repair of various cell damage and confirmed that D. radiodurans extreme radiation resistance is determined by a multiplicity of pathways acting as a complex network.
25805638			TN	Multimodality management of high-risk head and neck basal cell carcinoma requiring free-flap reconstruction.
25805638			TN	OBJECTIVES: (1) Investigate overall survival (OS) and disease-free survival (DFS) for high-risk head and neck basal cell carcinoma (HNBCC) requiring large extirpation with free-flap reconstruction.
25805638			TN	(2) Determine impact of prognostic features-tumor size, subsite, number of high-risk features, perineural invasion, and bony invasion-on high-risk HNBCC survival.
25805638			TN	(3) Determine survival benefit of adjuvant radiation for high-risk HNBCC.
25805638			TN	STUDY DESIGN: Case series with chart review (2002-2013).
25805638			TN	SETTING: Academic tertiary care center.
25805638			TN	SUBJECTS AND METHODS: Consecutive head and neck patients (N = 431) required free-flap reconstruction following tumor extirpation, 38 for aggressive HNBCC.
25805638			TN	All cases were high risk.
25805638			TN	DFS and OS were examined using Kaplan-Meier analysis.
25805638			TN	Prognostic variables and adjuvant radiation were analyzed utilizing Student's t test for continuous variables and Fisher's exact testing for categorical dependent variables.
25805638			TN	Complications were reported.
25805638			TN	RESULTS: Mean tumor diameter was 5.17 cm (range, 1.2-15.0 cm).
25805638			TN	Mean follow-up was 19.9 months.
25805638			TN	Overall 2-year survival was 80%, falling to 66% at 5 years.
25805638			TN	Two-year disease-free survival was 72%.
25805638			TN	Six patients recurred (n = 5 local, 1 distant).
25805638			TN	Adjuvant radiotherapy improved DFS (P < .01) but not OS (P = .66).
25805638			TN	Tumors >2.5 cm did not affect OS (P = .61), regardless of subsite.
25805638			TN	Bone involvement (44.7% cases) did not affect DFS (P = .39) or OS (P = .18).
25805638			TN	CONCLUSIONS: Larger HNBCC warranting free tissue transfer do not confer worse outcomes, independent of subsite.
25805638			TN	Adjuvant radiotherapy does not improve OS but significantly affected DFS, allowing for 13.7 additional months of DFS.
25805638			TN	Bone involvement does not influence DFS or OS and should not preclude surgery, even in advanced cases requiring free-flap reconstruction.
25805638			TN	漏 American Academy of Otolaryngology-Head and Neck Surgery Foundation 2015.
25775652			TN	Recall Dermatitis to Metronidazole.
25775652			TN	BACKGROUND AND OBJECTIVE: Recall dermatitis is an uncommon entity that has been noted with patch testing, repeat exposures to a medication or allergen, and the concurrent use of ultraviolet radiation and certain medications.
25775652			TN	Recall dermatitis from primary cutaneous exposure and subsequent oral exposure are rare, and the etiology remains unknown.
25775652			TN	CONCLUSION: We report a case of recall dermatitis with a drug eruption secondary to metronidazole.
25775652			TN	Therapy with this medication was initially topical for rosacea and subsequently oral for a gastrointestinal infection.
25775652			TN	This case draws attention to the use of metronidazole and the risk of recall dermatitis.
25775652			TN	漏 2014 Canadian Dermatology Association.
25769185			TN	Cyclobutane pyrimidine dimers photolyase from extremophilic microalga: remarkable UVB resistance and efficient DNA damage repair.
25769185			TN	Bacteria living in the Antarctic region have developed several adaptive features for growth and survival under extreme conditions.
25769185			TN	Chlamydomonas sp.
25769185			TN	ICE-Lis well adapted to high levels of solar UV radiation.
25769185			TN	A putative photolyase was identified in the Chlamydomonas sp.
25769185			TN	ICE-L transcriptome.
25769185			TN	The complete cDNA sequence was obtained by RACE-PCR.
25769185			TN	This PHR encoding includes a polypeptide of 579 amino acids with clear photolyase signatures belonging to class II CPD-photolyases, sharing a high degree of homology with Chlamydomonas reinhardtii (68%).
25769185			TN	Real-time PCR was performed to investigate the potential DNA damage and responses following UVB exposure.
25769185			TN	CPD photolyase mRNA expression level increased over 50-fold in response to UVB radiation for 6h.
25769185			TN	Using photolyase complementation assay, we demonstrated that DNA photolyase increased photo-repair more than 116-fold in Escherichia coli strain SY2 under 100渭w/cm(2) UVB radiation.
25769185			TN	To determine whether photolyase is active in vitro, CPD photolyase was over-expressed.
25769185			TN	It was shown that pyrimidine dimers were split by the action of PHR2.
25769185			TN	This study reports the unique structure and high activity of the enzyme.
25769185			TN	These findings are relevant for further understanding of molecular mechanisms of photo-reactivation, and will accelerate the utilization of photolyase in the medical field.
25769185			TN	Copyright 漏 2015 Elsevier B.V. All rights reserved.
26371782			TN	Angiosarcoma Arising in Chronic Expanding Hematoma: Five Cases of an Underrecognized Association.
26371782			TN	Little is known about the etiology or pathogenesis of angiosarcoma (AS).
26371782			TN	We describe a series of 5 cases of AS arising in chronic expanding hematomas.
26371782			TN	Inclusion criteria were the presence of a hematoma of at least 1-year duration and a thick fibrous wall surrounding the hematoma.
26371782			TN	Patients were 4 men and 1 woman; ages ranged from 43 to 71 years.
26371782			TN	Locations were the thigh (3), chest wall (1), and pelvic soft tissue involving the ischial bone (1).
26371782			TN	Hematoma duration ranged from 2 to 25 years.
26371782			TN	All cases had large cystic hematomas >10 cm; 2 had prior radiation.
26371782			TN	Thick fibrous walls surrounded the hematomas, with foci of hemosiderin and foamy histiocytes.
26371782			TN	Wall thickness ranged from 0.2 to 1.0 cm and varied within lesions.
26371782			TN	All AS were epithelioid, and in 3 cases the tumor invaded through the cyst wall.
26371782			TN	Immunoreactive nuclear c-myc was noted in 3/3 cases available for testing.
26371782			TN	Follow-up disclosed 4 patients developed metastatic disease, 3 of whom died of disease, 4, 8, and 15 months after diagnosis; the fourth patient is alive without disease after chemotherapy at 59 months.
26371782			TN	One patient without metastases is alive without disease 18 months after diagnosis; this tumor was confined to the cyst without penetration through the wall.
26371782			TN	We identified 4 similar cases in the literature, 3 as individual case reports (all epithelioid AS), and 1 as part of a series of AS.
26371782			TN	To our knowledge, this is the first series of AS arising in chronic expanding hematomas.
26371782			TN	Recognition of this unusual complication should alert clinicians to provide periodic clinical follow-up to these patients and to biopsy any case with sudden or uncontrolled enlargement.
26371782			TN	We recommend that excised chronic hematomas be well sampled histologically to search for AS and, if identified, to determine its extent and invasiveness.
25492479			TN	Systemic therapy of brain metastases.
25492479			TN	Brain metastases are a common complication of cancer and continue to be associated with a poor prognosis.
25492479			TN	Management of brain metastases typically requires a multidisciplinary approach which may include whole-brain radiation therapy, stereotactic radiosurgery, surgery, and systemic therapy.
25492479			TN	Historically, the use of systemic therapy in brain metastases has been challenging because of the resistance to conventional chemotherapies secondary to the blood-brain barrier and an often heavily pre-treated patient population, and the paucity of well-conducted randomized trials in these heterogeneous patient populations.
25492479			TN	Newer agents, including immunotherapy and targeted therapies, are playing increasingly important roles in the up-front management of brain metastases.
25492479			TN	In this overview, we review recent advances in systemic therapies for brain metastases and the evidence supporting their use in this patient population.
24615281			TN	The evolution of reproduction-related NLRP genes.
24615281			TN	NLRP proteins are important components of inflammasomes with a major role in innate immunity.
24615281			TN	A subset of NLRP genes, with unknown functions, are expressed in oocytes and early embryos.
24615281			TN	Mutations of Nlrp5 in mice are associated with maternal-effect embryonic lethality and mutations of NLRP7 in women are associated with conception of biparental complete hydatidiform moles (biCHMs), suggesting perturbed processes of genomic imprinting.
24615281			TN	Recessive mutations on NLRP2/7 in humans are associated with reproductive disorders and appear to be induced by a demethylation of the maternal pronucleus.
24615281			TN	In this study, we find that radiation of NLRP genes occurred before the common ancestor of Afrotheria and Boreoeutheria, with the clade of oocyte-expressed genes originating before the divergence of marsupial and eutherian mammals.
24615281			TN	There have been multiple independent duplications of NLRP2 genes one of which produced the NLRP7 gene associated with biCHMs.
24424560			TN	Preliminary results: prospective clinical study to assess image-based iterative reconstruction for abdominal computed tomography acquired at 2 radiation dose levels.
24424560			TN	OBJECTIVE: The objective of this study was to compare image quality for abdominal computed tomographic (CT) images acquired at 200 and 50 mA s and reconstructed with image-based iterative reconstruction.
24424560			TN	MATERIALS AND METHODS: In this institutional review board-approved prospective study, 22 patients (mean [SD] age, 64.3 [14.4] years; male-female ratio, 12:10) gave informed consent for acquisition of additional abdominal CT images on 64-slice multi-detector CT (MDCT) (Siemens Definition Flash).
24424560			TN	Standard-dose images were acquired at 200 quality reference mA s, whereas low-dose images were acquired at 50 mA s (all series: 120 kV; 5-mm section thickness; pitch, 0.9:1).
24424560			TN	The low-dose images were reconstructed with a nonlinear 3-dimensional iterative image reconstruction (3D-IIR) (SafeCT; MedicVision, Tirat Carmel, Israel) (4 settings, namely, A1, A2, A3, and A4) and were assessed by 3 abdominal radiologists for lesion detection, image noise, and visibility of small structures.
24424560			TN	CATPHAN 500 was scanned at the respective doses to obtain noise spectral density and modulation transfer function.
24424560			TN	RESULTS: Subjective image noise was unacceptable at 50-mA s filtered back projection and improved to average in 50-mA s A1 and minimal or no noise in 50-mA s A4.
24424560			TN	However, the visibility of small structures was similar to standard-dose filtered back projection images on 50-mA s A2.
24424560			TN	Objective image noise was reduced to 66% for the 50-mA s 3D-IIR images (9.08 [2.3]/26.75 [6.8]).
24424560			TN	The modulation transfer function curve demonstrated resolution improvement in the low-dose images with the 3D-IIR technique, whereas the noise spectral density curve confirmed noise suppression in the 50-mA s 3D-IIR images.
24424560			TN	CONCLUSIONS: Three-dimensional iterative image reconstruction helps to lower image noise without affecting the visibility of small structures at "moderate" settings.
24424560			TN	Diagnostically acceptable abdominal CT examinations can be acquired at 75% lower-radiation dose with the help of the image-based iterative reconstruction technique.
25303909			TN	A prospective video-controlled study of genito-urinary disorders in 35 consecutive laparoscopic TMEs for rectal cancer.
25303909			TN	INTRODUCTION: Genito-urinary disorders (GUD) for radical rectal cancer surgery range from 10 to 30%.
25303909			TN	In this study, primary endpoint is to prospectively assess their incidence in patients undergoing Laparoscopic Total Mesorectal Excision (LTME) without neoadjuvant chemo-radiation (NCR).
25303909			TN	Secondary endpoint is to detect the potential lesion site evaluating video-recordings of surgery.
25303909			TN	PATIENTS AND METHODS: A study of 35 consecutive patients treated by LTME for extra-peritoneal rectal cancer not subjected to NCR, M:F = 23:12, median age 70, was evaluated preoperatively by Uroflowmetry and US postvoid residual urine measurement (PVR), International Prostatic Symptoms Score (IPSS), and International Consultation on Incontinence Modular Questionnaire (ICIQ) at 1 and 9 months post-…
25303909			TN	Evaluation of sexual function was carried out by International Index of Erectile Function (IIEF) in males.
25303909			TN	Data were analyzed performing Fisher and paired samples t tests.
25303909			TN	Surgical videos of patients affected by GUD were reviewed to identify lesion sites.
25303909			TN	RESULTS: Urinary function:IPSS average score: baseline 6.03 卤 5.51, 8.93 卤 6.42 (p = .005) at 1 month, and 7.26 卤 5.55 (p = .041) at 9 months.
25303909			TN	ICIQ baseline 2.67 卤 5.42, 4.27 卤 6.19 (p = NS) at 1 month, and 3.63 卤 5.23 (p = NS) at 9 months.
25303909			TN	Maximum urine flow rate baseline 15.95 卤 4.78 ml/s, 14.23 卤 5.27 after 1 month (p = .041), and 15.22 卤 4.01 after 9 months (p = NS).
25303909			TN	Mean urine flow rate baseline 9.15 卤 2.96 ml/s, 7.99 卤 4.12 ml/s at 1 month (p = .044), and 8.54 卤 4.19 ml/s at 9 months (p = NS).
25303909			TN	PVR baseline 59.62 卤 54.49, 64.59 卤 58.71 (p = NS) at 1 month, and 68.82 卤 77.72 (p = NS) at 9 months.
25303909			TN	Sexual function: IIEF baseline 19.38 卤 6.25, 14.06 卤 8.65 at 1 month (p = .011), and 15.4 卤 8.41 at 9 months, (p = NS).
25303909			TN	Video review of patients with disorders showed potential damage at the site of ligation of IMA (high hypogastric plexus) in 1 case, lateral and posterior mesorectum dissection (hypogastric nerves) in 2 cases, anterior dissection of the Denonvilliers fascia from seminal vesicles in 2 cases.
25303909			TN	CONCLUSIONS: GUD at 1 month from LTME for rectal cancer are significant but improve at 9 months.
25303909			TN	Surgical video review of patients with GUD provides an important tool for detection of lesion sites.
25304710			TN	Pros and cons of organ shielding for CT imaging.
25304710			TN	With the increased importance of CT radiation dose to health care providers, patients and the general public, there is an increased responsibility to minimize patient dose effectively.
25304710			TN	Bismuth shields offer a simple strategy to reduce dose to certain anterior radiosensitive organs such as breasts and eyes.
25304710			TN	However, in order to reduce organ dose they must be used properly; improper use can lead to an actual increase in the patient dose.
25304710			TN	They also create a proportional increase in image noise in the section of the body adjacent to the shield and further reduce the quantitative precision of CT numbers.
25304710			TN	In addition, shielding can degrade the overall efficiency (by an order of approximately 10%) of the imaging process, reducing the theoretical image quality that can be expected from a certain level of patient dose.
25304710			TN	However, in spite of their significant disadvantages, there are certain clinical situations and practice considerations that provide qualified justification for their continued use.
25204643			TN	Transitioning from conventional radiotherapy to intensity-modulated radiotherapy for localized prostate cancer: changing focus from rectal bleeding to detailed quality of life analysis.
25204643			TN	With the advent of modern radiation techniques, we have been able to deliver a higher prescribed radiotherapy dose for localized prostate cancer without severe adverse reactions.
25204643			TN	We reviewed and analyzed the change of toxicity profiles of external beam radiation therapy (EBRT) from the literature.
25204643			TN	Late rectal bleeding is the main adverse effect, and an incidence of >20% of Grade 鈮? adverse events was reported for 2D conventional radiotherapy of up to 70 Gy.
25204643			TN	3D conformal radiation therapy (3D-CRT) was found to reduce the incidence to 鈭?0%.
25204643			TN	Furthermore, intensity-modulated radiation therapy (IMRT) reduced it further to a few percentage points.
25204643			TN	However, simultaneously, urological toxicities were enhanced by dose escalation using highly precise external radiotherapy.
25204643			TN	We should pay more attention to detailed quality of life (QOL) analysis, not only with respect to rectal bleeding but also other specific symptoms (such as urinary incontinence and impotence), for two reasons: (i) because of the increasing number of patients aged >80 years, and (ii) because of improved survival with elevated doses of radiotherapy and/or hormonal therapy; age is an important progn…
25204643			TN	Those factors shift the main focus of treatment purpose from survival and avoidance of PSA failure to maintaining good QOL, particularly in older patients.
25204643			TN	In conclusion, the focus of toxicity analysis after radiotherapy for prostate cancer patients is changing from rectal bleeding to total elaborate quality of life assessment.
25204643			TN	漏 The Author 2014.
25204643			TN	Published by Oxford University Press on behalf of The Japan Radiation Research Society and Japanese Society for Radiation Oncology.
23763883			TN	How can I help myself?
23763883			TN	A critical review of modifiable behaviors, medications, and complementary alternative medicine for men receiving radiotherapy for prostate cancer.
23763883			TN	Men receiving radiation for prostate cancer frequently want to know what steps they can take to optimize their chance of cure and reduce their risk of side effects.
23763883			TN	A variety of modifiable behaviors, medications, and complementary alternative medicine interventions have been investigated in this regard.
23763883			TN	In this review, we summarize data on tobacco use, exercise, statins and aspirin, and vitamins.
23763883			TN	There is limited randomized data supporting any of the interventions and additional studies are needed before clinicians can confidently inform their patients regarding what steps to take to improve their outcomes.
23763883			TN	Copyright 漏 2013.
23763883			TN	Published by Elsevier Inc.
24079656			TN	Positive selection in glycolysis among Australasian stick insects.
24079656			TN	BACKGROUND: The glycolytic pathway is central to cellular energy production.
24079656			TN	Selection on individual enzymes within glycolysis, particularly phosphoglucose isomerase (Pgi), has been associated with metabolic performance in numerous organisms.
24079656			TN	Nonetheless, how whole energy-producing pathways evolve to allow organisms to thrive in different environments and adopt new lifestyles remains little explored.
24079656			TN	The Lanceocercata radiation of Australasian stick insects includes transitions from tropical to temperate climates, lowland to alpine habitats, and winged to wingless forms.
24079656			TN	This permits a broad investigation to determine which steps within glycolysis and what sites within enzymes are the targets of positive selection.
24079656			TN	To address these questions we obtained transcript sequences from seven core glycolysis enzymes, including two Pgi paralogues, from 29 Lanceocercata species.
24079656			TN	RESULTS: Using maximum likelihood methods a signature of positive selection was inferred in two core glycolysis enzymes.
24079656			TN	Pgi and Glyceraldehyde 3-phosphate dehydrogenase (Gaphd) genes both encode enzymes linking glycolysis to the pentose phosphate pathway.
24079656			TN	Positive selection among Pgi paralogues and orthologues predominately targets amino acids with residues exposed to the protein's surface, where changes in physical properties may alter enzyme performance.
24079656			TN	CONCLUSION: Our results suggest that, for Lancerocercata stick insects, adaptation to new stressful lifestyles requires a balance between maintaining cellular energy production, efficiently exploiting different energy storage pools and compensating for stress-induced oxidative damage.
23937757			TN	Mechanical axis of the lower extremity determined by a new digital photographic method.
23937757			TN	Assessment of the mechanical axis is routine during the examination of patients with lower extremity pain.
23937757			TN	Long-leg radiographic examination is the gold standard for exact measurement, but it is associated with a significant radiation dose.
23937757			TN	An alternative method to examine the mechanical axis has been warranted.
23937757			TN	This article validates a newly developed computerized photograph method to calculate the mechanical axis using a digital photograph.
23937757			TN	The location of the center of the femoral head was calculated using ink marks on both superior iliac spines.
23937757			TN	Twenty-five patients (10 women and 15 men) had both legs examined using the photographic method and long-leg radiography examination.
23937757			TN	The digital photograph method was found to be highly reliable.
23937757			TN	The interobserver absolute mean difference was 0.99掳卤0.85掳, and the intraobserver absolute mean difference (day-to-day variation) was 1.04掳卤0.81掳.
23937757			TN	The mechanical axis determined by the 2 methods was highly correlated (R=0.943).
23937757			TN	The long-leg radiography method was within an average of 卤1.88掳 of the photographic method, with a 95% probability.
23937757			TN	The photographic method appears to be an effective alternative to conventional long-leg radiography.
23937757			TN	The photographic method seems convenient in the routine examination of patients with leg pain and children with suspected axial deformity and for follow-up after treatment for malalignment.
23937757			TN	Calculation coefficients for children and a possible racial difference remain to be studied.
23937757			TN	Copyright 2013, SLACK Incorporated.
22202156			TN	Future prospects for targeted alpha therapy.
22202156			TN	The objectives in the application of targeted alpha therapy (TAT) for cancer therapy are reviewed.
22202156			TN	These relate to elimination of isolated cancer cells, cell clusters and tumors.
22202156			TN	Requirements for isolated cancer cells are good cellular targeting, high specific activity, and very short range.
22202156			TN	The regression of cell clusters in the peri-vascular space requires high capillary permeability and short range cross fire whereas for developed tumors, good bioavailabilty and anti- capillary activity are essential.
22202156			TN	Current sources of alpha radiation are reviewed and the prospects for commercial sources for clinical application are discussed.
22202156			TN	The Ac:Bi generator is the most practical alpha source, bringing therapy to Nuclear Medicine with the same practicality as the Mo:Tc generator has for imaging.
22202156			TN	The status quo of TAT is briefly reviewed with respect to dose normalization, real time microdosimetry and biological dosimetry for deterministic and stochastic effects and toxicity.
22202156			TN	The role of Monte Carlo calculations is emphasized.
22202156			TN	The strengths and weaknesses of TAT are examined and the way forward for clinical acceptance is discussed.
21525794			TN	The contribution of Elaine Ron PhD to radiation epidemiology.
21509186			TN	Para-inflammation mediates systemic DNA damage in response to tumor growth.
21509186			TN	The radiation induced bystander effect is a well-accepted consequence of ionizing radiation exposure.
21509186			TN	However, it has become clear that bystander responses in vitro can result from a number of stress stimuli.
21509186			TN	We had reported that media conditioned on tumor cell cultures induced a bystander effect in recipient normal cell cultures and asked whether an analogous process could occur in vivo-could the presence of a tumor induce DNA damage in distant tissues.
21509186			TN	We recently demonstrated the presence of a distant bystander DNA damage response in vivo in the gastrointestinal organs and skin of mice implanted with subcutaneous tumors.
21509186			TN	The activation of inflammatory macrophages through the cytokine CCL2 was found to be required for this distant genotoxic response.
21509186			TN	These results shed new light on the consequences of tumor growth to distant parts of the body and highlight the potential for possible medical interventions to mitigate the effect of cancers.
21431890			TN	Estimation of focal and extra-focal radiation profiles based on Gaussian modeling in medical linear accelerators.
21431890			TN	The X-ray source or focal radiation is one of the factors that can degrade the conformal field edge in stereotactic body radiotherapy.
21431890			TN	For that reason, it is very important to estimate the total focal radiation profiles of linear accelerators, which consists of X-ray focal-spot radiation and extra-focal radiation profiles.
21431890			TN	Our purpose in this study was to propose an experimental method for estimating the focal-spot and extra-focal radiation profiles of linear accelerators based on triple Gaussian functions.
21431890			TN	We measured the total X-ray focal radiation profiles of the accelerators by moving a slit in conjunction with a photon field p-type silicon diode.
21431890			TN	The slit width was changed so that the extra-focal radiation could be optimally included in the total focal radiation.
21431890			TN	The total focal radiation profiles of an accelerator at 4-MV and 10-MV energies were approximated with a combination of triple Gaussian functions, which correspond to the focal-spot radiation, extra-focal radiation, and radiation transmitted through the slit assembly.
21431890			TN	As a result, the ratios of the Gaussian peak value of the extra-focal radiation to that of the focal spot for 4 and 10聽MV were 0.077 and 0.159, respectively.
21431890			TN	The peak widths of the focal-spot and extra-focal radiation profiles were 0.57 and 25.0聽mm for 4聽MV, respectively, and 0.60 and 22.0聽mm for 10聽MV, respectively.
21431890			TN	We concluded that the proposed focal radiation profile model based on the triple Gaussian functions may be feasible for estimating the X-ray focal-spot and extra-focal radiation profiles.
21235233			TN	Venturi easy ambient sonic-spray ionization.
21235233			TN	The development and illustrative applications of an ambient ionization technique termed Venturi easy ambient sonic-spray ionization (V-EASI) is described.
21235233			TN	Its dual mode of operation with Venturi self-pumping makes V-EASI applicable to the direct mass spectrometric analysis of both liquid (V(L)-EASI) and solid (V(S)-EASI) samples.
21235233			TN	V-EASI is simple and easy to assemble, operating solely via the assistance of a sonic stream of nitrogen or air.
21235233			TN	The sonic gas stream causes two beneficial and integrated effects: (a) the self-pumping of solutions via the Venturi effect and (b) sonic-spray ionization (SSI) of analytes either in solution or resting on solid surfaces.
21235233			TN	In its liquid mode, V(L)-EASI is applicable to analytes in solution, forming negatively and/or positively charged intact molecular species in a soft fashion with little or no fragmentation.
21235233			TN	In its solid mode, V(S)-EASI relies on Venturi self-pumping of a proper SSI solvent solution in combination with SSI to form a stream of bipolar charged droplets that bombard the sample surface, causing desorption and ionization of the analyte molecules.
21235233			TN	As for its precursor technique (EASI), V-EASI generates bipolar droplets with considerably lower average charging, which increases selectivity for ionization with high signal-to-noise ratios and clean spectra dominated by single molecular species with minimal solvent ions.
21235233			TN	V-EASI also operates in a voltage-, heat-, and radiation-free fashion and is therefore free of thermal, electrical, or discharge interferences.
21925100			TN	Greater than the sum of their parts: combination strategies for immune regeneration following allogeneic hematopoietic stem cell transplantation.
21925100			TN	Cytoreductive conditioning regimes designed to allow for successful allogeneic hematopoietic stem cell transplantation (allo-HSCT) paradoxically are also detrimental to recovery of the immune system in general but lymphopoiesis in particular.
21925100			TN	Post-transplant immune depletion is particularly striking within the T cell compartment which is exquisitely sensitive to negative regulation, evidenced by the profound decline in thymic function with age.
21925100			TN	As a consequence, regeneration of the immune system remains a significant unmet clinical need.
21925100			TN	Over the past decade studies have revealed several promising therapeutic strategies to address ineffective lymphopoiesis and post-transplant immune deficiency.
21925100			TN	These include the use of cytokines such as IL-7, IL-12 and IL-15; growth factors and hormones like keratinocyte growth factor (KGF), insulin-like growth factor (IGF)-1 and growth hormone (GH); adoptive transfer of ex vivo-generated precursor T cells (pre-T) and sex steroid ablation (SSA).
21925100			TN	Moreover, recently several novel approaches have been proposed to generate whole thymii ex vivo using stem cell technologies and bioscaffolds.
21925100			TN	Increasingly, however, when transferred to the clinic, these strategies alone are not sufficient to restore thymopoiesis in all patients leading to the potential of combination strategies as a way to reign in non-responders.
21925100			TN	Synergistic enhancement in combination may be due to differential targets may therefore be effective in improving clinical outcomes in the transplant settings as well as in other lymphopenic states induced by high dose chemotherapy/radiation therapy or HIV, and may also be useful in improving responses to vaccination and augmenting anti-tumor immunotherapy.
21925100			TN	Published by Elsevier Ltd.
20171524			TN	Radiation-associated liver injury.
20171524			TN	The liver is a critically important organ that has numerous functions including the production of bile, metabolism of ingested nutrients, elimination of many waste products, glycogen storage, and plasma protein synthesis.
20171524			TN	The liver is often incidentally irradiated during radiation therapy (RT) for tumors in the upper- abdomen, right lower lung, distal esophagus, or during whole abdomen or whole body RT.
20171524			TN	This article describes the endpoints, time-course, and dose-volume effect of radiation on the liver.
20171524			TN	Published by Elsevier Inc.
20699700			TN	Preconceptional paternal exposure to depleted uranium: transmission of genetic damage to offspring.
20699700			TN	Depleted uranium (DU) is an alpha particle emitter and radioactive heavy metal used in military applications.
20699700			TN	Due to internalization of DU during military operations and the ensuing chronic internal exposure to DU, there are concerns regarding its potential health effects.
20699700			TN	Preconceptional paternal irradiation has been implicated as a causal factor in childhood cancer and it has been suggested that this paternal exposure to radiation may play a role in the occurrence of leukemia and other cancers to offspring.
20699700			TN	Similarly, in vivo heavy metal studies have demonstrated that carcinogenic effects can occur in unexposed offspring.
20699700			TN	Using a transgenic mouse system employing a lambda shuttle vector allowing mutations (in the lacI gene) to be analyzed in vitro, we have investigated the possibility that chronic preconceptional paternal DU exposure can lead to transgenerational transmission of genomic instability.
20699700			TN	The mutation frequencies in vector recovered from the bone marrow cells of the F1 offspring of male parents exposed to low, medium, and high doses of internalized DU for 7 mo were evaluated and compared to control, tantalum, nickel, and gamma radiation F1 samples.
20699700			TN	Results demonstrate that as paternal DU-dose increased there was a trend towards higher mutation frequency in vector recovered from the DNA obtained from bone marrow of F1 progeny; medium and high dose DU exposure to P1 fathers resulted in a significant increase in mutation frequency in F1 offspring (3.57 +or - 0.37 and 4.81 + or - 0.43 x 10; p < 0.001) in comparison to control (2.28 + or - 0.31 …
20699700			TN	The mutation frequencies from F1 offspring of low dose DU, Ta- or Ni-implanted fathers (2.
20699700			TN	71 + or - 0.35, 2.38 + or - 0.35, and 2.93 + or - 0.39 x 10, respectively) were not significantly different than control levels (2.28 + or - 0.31 x 10).
20699700			TN	Offspring from Co (4 Gy) irradiated fathers did demonstrate an increased lacI mutation frequency (4.69 + or - 0.48 x 10) as had been shown previously.
20699700			TN	To evaluate the role of radiation involved in the observed DU effects, males were exposed to equal concentrations (50 mg U L) of either enriched uranium or DU in their drinking water for 2 mo prior to breeding.
20699700			TN	A comparison of these offspring indicated that there was a specific-activity dependent increase in offspring bone marrow mutation frequency.
20699700			TN	Taken together these uranyl nitrate data support earlier results in other model systems showing that radiation can play a role in DU-induced biological effects in vitro.
20699700			TN	However, since the lacI mutation model measures point mutations and cannot measure large deletions that are characteristic of radiation damage, the role of DU chemical effects in the observed offspring mutation frequency increase may also be significant.
20699700			TN	Regardless of the question of DU-radiation vs. DU-chemical effects, the data indicate that there exists a route for transgenerational transmission of factor(s) leading to genomic instability in F1 progeny from DU-exposed fathers.
